# Supplementary material for: INOVATYON/ ENGOT-ov5 study: Randomized phase III international study comparing trabectedin/pegylated liposomal doxorubicin (PLD) followed by platinum at progression vs carboplatin/PLD in patients with recurrent ovarian cancer progressing within 6-12 months after last platinum line
Source: PubMed Central journal article supplement (PMC10070417; doi:10.1038/s41416-022-02108-7), 2023-02-09
Supplement: 41416_2022_2108_MOESM1_ESM.pdf [file 41416_2022_2108_MOESM1_ESM.pdf]

## **Table of contents**

|                                                                                                                            |           |
|----------------------------------------------------------------------------------------------------------------------------|-----------|
| <b>TABLE S1. TREATMENT COMPLIANCE .....</b>                                                                                | <b>2</b>  |
| <b>TABLE S2. THE MULTIVARIABLE ANALYSIS OF OS.....</b>                                                                     | <b>3</b>  |
| <b>TABLE S3. MAXIMUM GRADE ADVERSE DRUG REACTIONS BY MEDDRA SYSTEM<br/>ORGAN CLASS (SOC) AND PREFERRED TERM (PT) .....</b> | <b>4</b>  |
| <b>TABLE S4. QUALITY OF LIFE - CHANGE FROM BASELINE.....</b>                                                               | <b>17</b> |
| <b>FIGURE S1. FOREST PLOT OF OVERALL SURVIVAL BY SUBGROUPS.....</b>                                                        | <b>18</b> |
| <b>FIGURE S2. KAPLAN-MEIER CURVES FOR PROGRESSION-FREE SURVIVAL AFTER<br/>SUBSEQUENT THERAPY (PFS-ST) .....</b>            | <b>19</b> |
| <b>FIGURE S3. KAPLAN-MEIER CURVES FOR PROGRESSION-FREE SURVIVAL AT<br/>THE SECOND PROGRESSION (PFS2).....</b>              | <b>20</b> |
| <b>APPENDIX A - INOVATYON STUDY GROUP .....</b>                                                                            | <b>21</b> |

**Table s1. Treatment compliance**

|                                                                | <b>carboplatin/PLD</b> | <b>trabectedin/PLD</b> | <b>OVERALL</b> |
|----------------------------------------------------------------|------------------------|------------------------|----------------|
|                                                                | <b>N=304</b>           | <b>N=307</b>           | <b>N=611</b>   |
| <b>Never started - n (%)</b>                                   | 10 (3.3)               | 3 (1.0)                | 13 (2.1)       |
| <b>Reasons:</b>                                                |                        |                        |                |
| Consent withdrawn                                              | 4 (40.0)               | 1 (33.3)               | 5 (38.5)       |
| Screening failure                                              | 5 (50.0)               | 0 (0.0)                | 5 (38.5)       |
| Physician decision                                             | 0 (0.0)                | 2 (66.7)               | 2 (15.4)       |
| Death                                                          | 1 (10.0)               | 0 (0.0)                | 1 (7.7)        |
| <b>Treatment interrupted <math>\geq</math>6 cycles - n (%)</b> | 208 (68.4)             | 164 (53.4)             | 372 (60.9)     |
| <b>Reason for the end of treatment:</b>                        |                        |                        |                |
| Treatment completed                                            | 146 (70.2)             | 89 (54.3)              | 235 (63.2)     |
| Disease progression                                            | 30 (14.4)              | 40 (24.4)              | 70 (18.8)      |
| Physician decision                                             | 20 (9.6)               | 14 (8.5)               | 34 (9.1)       |
| Unacceptable toxicity                                          | 7 (3.4)                | 12 (7.3)               | 19 (5.1)       |
| Patient refusal                                                | 5 (2.4)                | 7 (4.3)                | 12 (3.2)       |
| Intercurrent illness of sufficient severity                    | 0 (0.0)                | 2 (1.2)                | 2 (0.5)        |
| <b>Treatment interrupted &lt; 6 cycles - n (%)</b>             | 86 (28.3)              | 140 (45.6)             | 226 (37.0)     |
| <b>Reason for discontinuation:</b>                             |                        |                        |                |
| Disease progression                                            | 55 (64.0)              | 70 (50.0)              | 125 (55.3)     |
| Unacceptable toxicity                                          | 13 (15.1)              | 26 (18.6)              | 39 (17.3)      |
| Patient refusal                                                | 2 (2.3)                | 15 (10.7)              | 17 (7.5)       |
| Physician decision                                             | 5 (5.8)                | 8 (5.7)                | 13 (5.8)       |
| Death                                                          | 4 (4.7)                | 6 (4.3)                | 10 (4.4)       |
| Intercurrent illness of sufficient severity                    | 2 (2.3)                | 8 (5.7)                | 10 (4.4)       |
| Consent withdrawn                                              | 2 (2.3)                | 3 (2.1)                | 5 (2.2)        |
| Lost to follow-up                                              | 0 (0.0)                | 1 (0.7)                | 1 (0.4)        |
| Screening failure                                              | 1 (1.2)                | 0 (0.0)                | 1 (0.4)        |
| Other                                                          | 2 (2.3)                | 3 (2.1)                | 5 (2.2)        |
| <b>Number of cycles</b>                                        |                        |                        |                |
| Median (Q1 - Q3)                                               | 6.0 (6.0-7.5)          | 6.0 (6.0-9.0)          | 6.0 (6.0-8.0)  |
| <b>Maintenance with Olaparib - n (%)</b>                       |                        |                        |                |
| No                                                             | 285 (96.6)             | -                      | 285 (96.6)     |
| Yes                                                            | 10 (3.4)               | 1 <sup>a</sup>         | 10 (3.4)       |
| Missing                                                        | 9                      | -                      | 9              |
| <b>Maintenance with other therapy - n (%)</b>                  |                        |                        |                |
| No                                                             | 266 (91.1)             | -                      | 266 (91.1)     |
| Yes                                                            | 26 (8.9)               | 1 <sup>a</sup>         | 26 (8.9)       |
| Missing                                                        | 12                     | -                      | 12             |
| <b>Maintenance with other therapy -specify-<br/>n (%)</b>      |                        |                        |                |
| Bevacizumab                                                    | 2 (7.7)                | 1 (100)                | 3 (11.1)       |
| Hormonal therapy                                               | 5 (19.2)               | 0 (0.0)                | 5 (18.5)       |
| Letrozol                                                       | 1 (3.8)                | 0 (0.0)                | 1 (3.7)        |
| Niraparib                                                      | 11 (42.3)              | 0 (0.0)                | 11 (40.7)      |
| Other                                                          | 7 (26.9)               | 0 (0.0)                | 7 (25.9)       |

**Legend:** SD: standard deviation. Q1-Q3: First -third quartile. Min-Max: minimum - maximum values.

a : even if the maintenance treatment were not applicable to arm trabectedin/PLD, the site confirmed data

**Table s2. The multivariable analysis of OS**

|                                                                       | Univariable analysis |             |         | Multivariable analysis |             |         |
|-----------------------------------------------------------------------|----------------------|-------------|---------|------------------------|-------------|---------|
|                                                                       | HR                   | 95% CI      | P-value | HR                     | 95% CI      | P-value |
| <b>Arm (trabectedin/PLD vs. carboplatin/PLD)</b>                      | 1.13                 | (0.94-1.35) | 0.1974  | 1.12                   | (0.93-1.35) | 0.2277  |
| <b>Presence of measurable disease at study entry</b>                  | 0.96                 | (0.79-1.18) | 0.7099  | 0.99                   | (0.80-1.22) | 0.9253  |
| <b>Number of prior treatments (II vs. I)</b>                          | 0.90                 | (0.74-1.09) | 0.2851  | 0.89                   | (0.71-1.11) | 0.2891  |
| <b>Previous anthracycline-based chemotherapy</b>                      | 1.10                 | (0.81-1.49) | 0.5566  | 1.00                   | (0.70-1.43) | 0.9886  |
| <b>Age (1 year increment)</b>                                         | 1.01                 | (1.00-1.02) | 0.0314  | 1.01                   | (1.00-1.02) | 0.0340  |
| <b>ECOG performance status (ref. 0)</b>                               |                      |             | <.0001  |                        |             | <.0001  |
| 1                                                                     | 1.48                 | (1.20-1.81) | 0.0002  | 1.46                   | (1.18-1.79) | 0.0003  |
| 2                                                                     | 4.34                 | (2.37-7.94) | <.0001  | 4.31                   | (2.30-8.07) | <.0001  |
| <b>BSA</b>                                                            | 0.95                 | (0.57-1.58) | 0.8359  |                        |             |         |
| <b>Primary site (ref. Ovary)</b>                                      |                      |             | 0.3464  |                        |             |         |
| Fallopian                                                             | 1.36                 | (0.91-2.04) | 0.1370  |                        |             |         |
| Peritoneal                                                            | 1.19                 | (0.83-1.71) | 0.3368  |                        |             |         |
| <b>Stage at diagnosis (ref. Early)</b>                                |                      |             | 0.4952  |                        |             |         |
| Advanced                                                              | 1.23                 | (0.87-1.75) | 0.2421  |                        |             |         |
| Unknown                                                               | 1.17                 | (0.72-1.91) | 0.5328  |                        |             |         |
| <b>Initial FIGO stage</b>                                             | 0.98                 | (0.92-1.05) | 0.5743  |                        |             |         |
| <b>Hystological Grade (ref. 1)</b>                                    |                      |             | 0.2381  |                        |             |         |
| 2                                                                     | 0.56                 | (0.30-1.07) | 0.0799  |                        |             |         |
| 3                                                                     | 0.55                 | (0.31-0.97) | 0.0404  |                        |             |         |
| Unknown                                                               | 0.57                 | (0.31-1.05) | 0.0698  |                        |             |         |
| <b>Hystological Type (ref. Serous)</b>                                |                      |             | <.0001  |                        |             |         |
| Endometrioid                                                          | 0.57                 | (0.31-1.03) | 0.0643  |                        |             |         |
| Clear Cell                                                            | 3.62                 | (2.18-6.02) | <.0001  |                        |             |         |
| Unspecified                                                           | 0.65                 | (0.31-1.37) | 0.2555  |                        |             |         |
| Mucinous                                                              | 2.45                 | (1.26-4.76) | 0.0080  |                        |             |         |
| Mixed Epithelial                                                      | 0.52                 | (0.23-1.17) | 0.1149  |                        |             |         |
| Transitional                                                          | 0.42                 | (0.06-2.98) | 0.3837  |                        |             |         |
| Unknown                                                               | 1.17                 | (0.71-1.94) | 0.5293  |                        |             |         |
| <b>Size of residual disease after initial surgery (ref. &lt;=1cm)</b> |                      |             | 0.8013  |                        |             |         |
| >1cm                                                                  | 1.04                 | (0.83-1.31) | 0.7185  |                        |             |         |
| Unknown                                                               | 1.08                 | (0.86-1.35) | 0.5189  |                        |             |         |
| <b>Germline BRCA 1 mutational status (ref. Wild-type)</b>             |                      |             | <.0001  |                        |             |         |
| Mutated                                                               | 0.68                 | (0.47-1.01) | 0.0532  |                        |             |         |
| Unknown                                                               | 1.40                 | (1.16-1.69) | 0.0004  |                        |             |         |
| <b>Germline BRCA 2 mutational status (ref. Wild-type)</b>             |                      |             | <.0001  |                        |             |         |
| Mutated                                                               | 0.43                 | (0.24-0.75) | 0.0029  |                        |             |         |
| Unknown                                                               | 1.38                 | (1.14-1.66) | 0.0007  |                        |             |         |
| <b>Germline BRCA mutational status (ref. Wild-type)</b>               |                      |             | <.0001  |                        |             |         |
| Mutated                                                               | 0.52                 | (0.37-0.73) | 0.0001  |                        |             |         |
| Unknown                                                               | 1.30                 | (1.07-1.57) | 0.0074  |                        |             |         |





|                                                                                | G0<br>n (%)   | G1<br>n (%) | G2<br>n (%) | G3<br>n (%) | G4<br>n (%) | G5<br>n (%) | G3+G4+G5<br>n (%) | Chi-<br>squared for<br>trend |
|--------------------------------------------------------------------------------|---------------|-------------|-------------|-------------|-------------|-------------|-------------------|------------------------------|
| Carboplatin/PLD                                                                | 271<br>(92.2) | 14 (4.8)    | 7 (2.4)     | 2 (0.7)     | 0 (0.0)     | 0 (0.0)     | 2 (0.7)           |                              |
| Trabectedin/PLD                                                                | 275<br>(90.5) | 15 (4.9)    | 9 (3.0)     | 5 (1.6)     | 0 (0.0)     | 0 (0.0)     | 5 (1.6)           |                              |
| <b>-12.5. Hypercalcaemia</b>                                                   |               |             |             |             |             |             |                   | 0.325                        |
| Carboplatin/PLD                                                                | 294<br>(100)  | 0 (0.0)     | 0 (0.0)     | 0 (0.0)     | 0 (0.0)     | 0 (0.0)     | 0 (0.0)           |                              |
| Trabectedin/PLD                                                                | 303<br>(99.7) | 0 (0.0)     | 1 (0.3)     | 0 (0.0)     | 0 (0.0)     | 0 (0.0)     | 0 (0.0)           |                              |
| <b>-12.6. Hyperglycaemia</b>                                                   |               |             |             |             |             |             |                   | 0.973                        |
| Carboplatin/PLD                                                                | 292<br>(99.3) | 2 (0.7)     | 0 (0.0)     | 0 (0.0)     | 0 (0.0)     | 0 (0.0)     | 0 (0.0)           |                              |
| Trabectedin/PLD                                                                | 302<br>(99.3) | 2 (0.7)     | 0 (0.0)     | 0 (0.0)     | 0 (0.0)     | 0 (0.0)     | 0 (0.0)           |                              |
| <b>-12.7. Hypermagnesaemia</b>                                                 |               |             |             |             |             |             |                   | 0.325                        |
| Carboplatin/PLD                                                                | 294<br>(100)  | 0 (0.0)     | 0 (0.0)     | 0 (0.0)     | 0 (0.0)     | 0 (0.0)     | 0 (0.0)           |                              |
| Trabectedin/PLD                                                                | 303<br>(99.7) | 1 (0.3)     | 0 (0.0)     | 0 (0.0)     | 0 (0.0)     | 0 (0.0)     | 0 (0.0)           |                              |
| <b>-12.8. Hypernatraemia</b>                                                   |               |             |             |             |             |             |                   | 0.309                        |
| Carboplatin/PLD                                                                | 293<br>(99.7) | 1 (0.3)     | 0 (0.0)     | 0 (0.0)     | 0 (0.0)     | 0 (0.0)     | 0 (0.0)           |                              |
| Trabectedin/PLD                                                                | 304<br>(100)  | 0 (0.0)     | 0 (0.0)     | 0 (0.0)     | 0 (0.0)     | 0 (0.0)     | 0 (0.0)           |                              |
| <b>-12.99. Other</b>                                                           |               |             |             |             |             |             |                   | 0.150                        |
| Carboplatin/PLD                                                                | 292<br>(99.3) | 2 (0.7)     | 0 (0.0)     | 0 (0.0)     | 0 (0.0)     | 0 (0.0)     | 0 (0.0)           |                              |
| Trabectedin/PLD                                                                | 304<br>(100)  | 0 (0.0)     | 0 (0.0)     | 0 (0.0)     | 0 (0.0)     | 0 (0.0)     | 0 (0.0)           |                              |
| <b>13. Musculoskeletal and connective tissue disorders</b>                     |               |             |             |             |             |             |                   | 0.285                        |
| Carboplatin/PLD                                                                | 281<br>(95.6) | 9 (3.1)     | 4 (1.4)     | 0 (0.0)     | 0 (0.0)     | 0 (0.0)     | 0 (0.0)           |                              |
| Trabectedin/PLD                                                                | 284<br>(93.4) | 14 (4.6)    | 6 (2.0)     | 0 (0.0)     | 0 (0.0)     | 0 (0.0)     | 0 (0.0)           |                              |
| <b>-13.1. Arthralgia</b>                                                       |               |             |             |             |             |             |                   | 0.050                        |
| Carboplatin/PLD                                                                | 290<br>(98.6) | 2 (0.7)     | 2 (0.7)     | 0 (0.0)     | 0 (0.0)     | 0 (0.0)     | 0 (0.0)           |                              |
| Trabectedin/PLD                                                                | 290<br>(95.4) | 10 (3.3)    | 4 (1.3)     | 0 (0.0)     | 0 (0.0)     | 0 (0.0)     | 0 (0.0)           |                              |
| <b>-13.12. Myalgia</b>                                                         |               |             |             |             |             |             |                   | 0.950                        |
| Carboplatin/PLD                                                                | 287<br>(97.6) | 5 (1.7)     | 2 (0.7)     | 0 (0.0)     | 0 (0.0)     | 0 (0.0)     | 0 (0.0)           |                              |
| Trabectedin/PLD                                                                | 296<br>(97.4) | 7 (2.3)     | 1 (0.3)     | 0 (0.0)     | 0 (0.0)     | 0 (0.0)     | 0 (0.0)           |                              |
| <b>-13.3. Bone pain</b>                                                        |               |             |             |             |             |             |                   | 0.309                        |
| Carboplatin/PLD                                                                | 293<br>(99.7) | 1 (0.3)     | 0 (0.0)     | 0 (0.0)     | 0 (0.0)     | 0 (0.0)     | 0 (0.0)           |                              |
| Trabectedin/PLD                                                                | 304<br>(100)  | 0 (0.0)     | 0 (0.0)     | 0 (0.0)     | 0 (0.0)     | 0 (0.0)     | 0 (0.0)           |                              |
| <b>-13.8. Muscular weakness</b>                                                |               |             |             |             |             |             |                   | 0.325                        |
| Carboplatin/PLD                                                                | 294<br>(100)  | 0 (0.0)     | 0 (0.0)     | 0 (0.0)     | 0 (0.0)     | 0 (0.0)     | 0 (0.0)           |                              |
| Trabectedin/PLD                                                                | 303<br>(99.7) | 0 (0.0)     | 1 (0.3)     | 0 (0.0)     | 0 (0.0)     | 0 (0.0)     | 0 (0.0)           |                              |
| <b>-13.99. Other</b>                                                           |               |             |             |             |             |             |                   | 0.041                        |
| Carboplatin/PLD                                                                | 290<br>(98.6) | 4 (1.4)     | 0 (0.0)     | 0 (0.0)     | 0 (0.0)     | 0 (0.0)     | 0 (0.0)           |                              |
| Trabectedin/PLD                                                                | 304<br>(100)  | 0 (0.0)     | 0 (0.0)     | 0 (0.0)     | 0 (0.0)     | 0 (0.0)     | 0 (0.0)           |                              |
| <b>14. Neoplasms benign, malignant and unspecified (incl cysts and polyps)</b> |               |             |             |             |             |             |                   | 0.186                        |
| Carboplatin/PLD                                                                | 292<br>(99.3) | 0 (0.0)     | 1 (0.3)     | 0 (0.0)     | 0 (0.0)     | 1 (0.3)     | 1 (0.3)           |                              |
| Trabectedin/PLD                                                                | 304<br>(100)  | 0 (0.0)     | 0 (0.0)     | 0 (0.0)     | 0 (0.0)     | 0 (0.0)     | 0 (0.0)           |                              |
| <b>-14.2. Cancer pain</b>                                                      |               |             |             |             |             |             |                   | 0.309                        |
| Carboplatin/PLD                                                                | 293<br>(99.7) | 0 (0.0)     | 1 (0.3)     | 0 (0.0)     | 0 (0.0)     | 0 (0.0)     | 0 (0.0)           |                              |
| Trabectedin/PLD                                                                | 304<br>(100)  | 0 (0.0)     | 0 (0.0)     | 0 (0.0)     | 0 (0.0)     | 0 (0.0)     | 0 (0.0)           |                              |
| <b>-14.99. Other</b>                                                           |               |             |             |             |             |             |                   | 0.309                        |
| Carboplatin/PLD                                                                | 293<br>(99.7) | 0 (0.0)     | 0 (0.0)     | 0 (0.0)     | 0 (0.0)     | 1 (0.3)     | 1 (0.3)           |                              |



|                                                            | G0<br>n (%)   | G1<br>n (%) | G2<br>n (%) | G3<br>n (%) | G4<br>n (%) | G5<br>n (%) | G3+G4+G5<br>n (%) | Chi-<br>squared for<br>trend |
|------------------------------------------------------------|---------------|-------------|-------------|-------------|-------------|-------------|-------------------|------------------------------|
| Carboplatin/PLD                                            | 285<br>(96.9) | 5 (1.7)     | 3 (1.0)     | 1 (0.3)     | 0 (0.0)     | 0 (0.0)     | 1 (0.3)           |                              |
| Trabectedin/PLD                                            | 297<br>(97.7) | 6 (2.0)     | 0 (0.0)     | 0 (0.0)     | 1 (0.3)     | 0 (0.0)     | 1 (0.3)           |                              |
| <b>-17.2. Dysuria</b>                                      |               |             |             |             |             |             |                   | 0.164                        |
| Carboplatin/PLD                                            | 294<br>(100)  | 0 (0.0)     | 0 (0.0)     | 0 (0.0)     | 0 (0.0)     | 0 (0.0)     | 0 (0.0)           |                              |
| Trabectedin/PLD                                            | 302<br>(99.3) | 2 (0.7)     | 0 (0.0)     | 0 (0.0)     | 0 (0.0)     | 0 (0.0)     | 0 (0.0)           |                              |
| <b>-17.3. Flank pain</b>                                   |               |             |             |             |             |             |                   | 0.638                        |
| Carboplatin/PLD                                            | 293<br>(99.7) | 0 (0.0)     | 1 (0.3)     | 0 (0.0)     | 0 (0.0)     | 0 (0.0)     | 0 (0.0)           |                              |
| Trabectedin/PLD                                            | 303<br>(99.7) | 1 (0.3)     | 0 (0.0)     | 0 (0.0)     | 0 (0.0)     | 0 (0.0)     | 0 (0.0)           |                              |
| <b>-17.5. Renal failure</b>                                |               |             |             |             |             |             |                   | 0.814                        |
| Carboplatin/PLD                                            | 288<br>(98.0) | 5 (1.7)     | 1 (0.3)     | 0 (0.0)     | 0 (0.0)     | 0 (0.0)     | 0 (0.0)           |                              |
| Trabectedin/PLD                                            | 301<br>(99.0) | 2 (0.7)     | 0 (0.0)     | 0 (0.0)     | 1 (0.3)     | 0 (0.0)     | 1 (0.3)           |                              |
| <b>-17.8. Urinary incontinence</b>                         |               |             |             |             |             |             |                   | 0.325                        |
| Carboplatin/PLD                                            | 294<br>(100)  | 0 (0.0)     | 0 (0.0)     | 0 (0.0)     | 0 (0.0)     | 0 (0.0)     | 0 (0.0)           |                              |
| Trabectedin/PLD                                            | 303<br>(99.7) | 1 (0.3)     | 0 (0.0)     | 0 (0.0)     | 0 (0.0)     | 0 (0.0)     | 0 (0.0)           |                              |
| <b>-17.99. Other</b>                                       |               |             |             |             |             |             |                   | 0.593                        |
| Carboplatin/PLD                                            | 292<br>(99.3) | 0 (0.0)     | 1 (0.3)     | 1 (0.3)     | 0 (0.0)     | 0 (0.0)     | 1 (0.3)           |                              |
| Trabectedin/PLD                                            | 301<br>(99.0) | 3 (1.0)     | 0 (0.0)     | 0 (0.0)     | 0 (0.0)     | 0 (0.0)     | 0 (0.0)           |                              |
| <b>18. Reproductive system and breast disorders</b>        |               |             |             |             |             |             |                   | 0.799                        |
| Carboplatin/PLD                                            | 293<br>(99.7) | 0 (0.0)     | 1 (0.3)     | 0 (0.0)     | 0 (0.0)     | 0 (0.0)     | 0 (0.0)           |                              |
| Trabectedin/PLD                                            | 303<br>(99.7) | 0 (0.0)     | 0 (0.0)     | 1 (0.3)     | 0 (0.0)     | 0 (0.0)     | 1 (0.3)           |                              |
| <b>-18.2. Genital herpes</b>                               |               |             |             |             |             |             |                   | 0.309                        |
| Carboplatin/PLD                                            | 293<br>(99.7) | 0 (0.0)     | 1 (0.3)     | 0 (0.0)     | 0 (0.0)     | 0 (0.0)     | 0 (0.0)           |                              |
| Trabectedin/PLD                                            | 304<br>(100)  | 0 (0.0)     | 0 (0.0)     | 0 (0.0)     | 0 (0.0)     | 0 (0.0)     | 0 (0.0)           |                              |
| <b>-18.5. Vulvar erosion</b>                               |               |             |             |             |             |             |                   | 0.309                        |
| Carboplatin/PLD                                            | 293<br>(99.7) | 0 (0.0)     | 1 (0.3)     | 0 (0.0)     | 0 (0.0)     | 0 (0.0)     | 0 (0.0)           |                              |
| Trabectedin/PLD                                            | 304<br>(100)  | 0 (0.0)     | 0 (0.0)     | 0 (0.0)     | 0 (0.0)     | 0 (0.0)     | 0 (0.0)           |                              |
| <b>-18.99. Other</b>                                       |               |             |             |             |             |             |                   | 0.325                        |
| Carboplatin/PLD                                            | 294<br>(100)  | 0 (0.0)     | 0 (0.0)     | 0 (0.0)     | 0 (0.0)     | 0 (0.0)     | 0 (0.0)           |                              |
| Trabectedin/PLD                                            | 303<br>(99.7) | 0 (0.0)     | 0 (0.0)     | 1 (0.3)     | 0 (0.0)     | 0 (0.0)     | 1 (0.3)           |                              |
| <b>19. Respiratory, thoracic and mediastinal disorders</b> |               |             |             |             |             |             |                   | 0.001                        |
| Carboplatin/PLD                                            | 277<br>(94.2) | 13 (4.4)    | 3 (1.0)     | 1 (0.3)     | 0 (0.0)     | 0 (0.0)     | 1 (0.3)           |                              |
| Trabectedin/PLD                                            | 268<br>(88.2) | 16 (5.3)    | 10 (3.3)    | 7 (2.3)     | 2 (0.7)     | 1 (0.3)     | 10 (3.3)          |                              |
| <b>-19.12. Pharyngolaryngeal pain</b>                      |               |             |             |             |             |             |                   | 0.332                        |
| Carboplatin/PLD                                            | 293<br>(99.7) | 1 (0.3)     | 0 (0.0)     | 0 (0.0)     | 0 (0.0)     | 0 (0.0)     | 0 (0.0)           |                              |
| Trabectedin/PLD                                            | 301<br>(99.0) | 3 (1.0)     | 0 (0.0)     | 0 (0.0)     | 0 (0.0)     | 0 (0.0)     | 0 (0.0)           |                              |
| <b>-19.13. Pulmonary embolism</b>                          |               |             |             |             |             |             |                   | 0.091                        |
| Carboplatin/PLD                                            | 294<br>(100)  | 0 (0.0)     | 0 (0.0)     | 0 (0.0)     | 0 (0.0)     | 0 (0.0)     | 0 (0.0)           |                              |
| Trabectedin/PLD                                            | 301<br>(99.0) | 0 (0.0)     | 0 (0.0)     | 2 (0.7)     | 1 (0.3)     | 0 (0.0)     | 3 (1.0)           |                              |
| <b>-19.16. Respiratory tract infection</b>                 |               |             |             |             |             |             |                   | 0.325                        |
| Carboplatin/PLD                                            | 294<br>(100)  | 0 (0.0)     | 0 (0.0)     | 0 (0.0)     | 0 (0.0)     | 0 (0.0)     | 0 (0.0)           |                              |
| Trabectedin/PLD                                            | 303<br>(99.7) | 0 (0.0)     | 1 (0.3)     | 0 (0.0)     | 0 (0.0)     | 0 (0.0)     | 0 (0.0)           |                              |
| <b>-19.17. Rhinitis allergic</b>                           |               |             |             |             |             |             |                   | 0.429                        |
| Carboplatin/PLD                                            | 293<br>(99.7) | 1 (0.3)     | 0 (0.0)     | 0 (0.0)     | 0 (0.0)     | 0 (0.0)     | 0 (0.0)           |                              |



|                                                   | G0<br>n (%)   | G1<br>n (%) | G2<br>n (%) | G3<br>n (%) | G4<br>n (%) | G5<br>n (%) | G3+G4+G5<br>n (%) | Chi-<br>squared for<br>trend |
|---------------------------------------------------|---------------|-------------|-------------|-------------|-------------|-------------|-------------------|------------------------------|
| Trabectedin/PLD                                   | 302<br>(99.3) | 1 (0.3)     | 1 (0.3)     | 0 (0.0)     | 0 (0.0)     | 0 (0.0)     | 0 (0.0)           | 0.325                        |
| <b>-19.2. Bronchitis</b>                          |               |             |             |             |             |             |                   |                              |
| Carboplatin/PLD                                   | 294<br>(100)  | 0 (0.0)     | 0 (0.0)     | 0 (0.0)     | 0 (0.0)     | 0 (0.0)     | 0 (0.0)           |                              |
| Trabectedin/PLD                                   | 303<br>(99.7) | 0 (0.0)     | 0 (0.0)     | 1 (0.3)     | 0 (0.0)     | 0 (0.0)     | 1 (0.3)           | 0.303                        |
| <b>-19.3. Cough</b>                               |               |             |             |             |             |             |                   |                              |
| Carboplatin/PLD                                   | 292<br>(99.3) | 1 (0.3)     | 1 (0.3)     | 0 (0.0)     | 0 (0.0)     | 0 (0.0)     | 0 (0.0)           |                              |
| Trabectedin/PLD                                   | 298<br>(98.0) | 5 (1.6)     | 1 (0.3)     | 0 (0.0)     | 0 (0.0)     | 0 (0.0)     | 0 (0.0)           | 0.002                        |
| <b>-19.5. Dyspnoea</b>                            |               |             |             |             |             |             |                   |                              |
| Carboplatin/PLD                                   | 289<br>(98.3) | 3 (1.0)     | 2 (0.7)     | 0 (0.0)     | 0 (0.0)     | 0 (0.0)     | 0 (0.0)           |                              |
| Trabectedin/PLD                                   | 282<br>(92.8) | 12 (3.9)    | 6 (2.0)     | 3 (1.0)     | 1 (0.3)     | 0 (0.0)     | 4 (1.3)           | 0.095                        |
| <b>-19.6. Epistaxis</b>                           |               |             |             |             |             |             |                   |                              |
| Carboplatin/PLD                                   | 286<br>(97.3) | 7 (2.4)     | 0 (0.0)     | 1 (0.3)     | 0 (0.0)     | 0 (0.0)     | 1 (0.3)           |                              |
| Trabectedin/PLD                                   | 301<br>(99.0) | 3 (1.0)     | 0 (0.0)     | 0 (0.0)     | 0 (0.0)     | 0 (0.0)     | 0 (0.0)           | 0.309                        |
| <b>-19.9. Nasopharyngitis</b>                     |               |             |             |             |             |             |                   |                              |
| Carboplatin/PLD                                   | 293<br>(99.7) | 1 (0.3)     | 0 (0.0)     | 0 (0.0)     | 0 (0.0)     | 0 (0.0)     | 0 (0.0)           |                              |
| Trabectedin/PLD                                   | 304<br>(100)  | 0 (0.0)     | 0 (0.0)     | 0 (0.0)     | 0 (0.0)     | 0 (0.0)     | 0 (0.0)           | 0.141                        |
| <b>-19.99. Other</b>                              |               |             |             |             |             |             |                   |                              |
| Carboplatin/PLD                                   | 291<br>(99.0) | 3 (1.0)     | 0 (0.0)     | 0 (0.0)     | 0 (0.0)     | 0 (0.0)     | 0 (0.0)           |                              |
| Trabectedin/PLD                                   | 298<br>(98.0) | 3 (1.0)     | 1 (0.3)     | 1 (0.3)     | 0 (0.0)     | 1 (0.3)     | 2 (0.7)           | 0.023                        |
| <b>2. Cardiac disorders</b>                       |               |             |             |             |             |             |                   |                              |
| Carboplatin/PLD                                   | 293<br>(99.7) | 1 (0.3)     | 0 (0.0)     | 0 (0.0)     | 0 (0.0)     | 0 (0.0)     | 0 (0.0)           |                              |
| Trabectedin/PLD                                   | 297<br>(97.7) | 1 (0.3)     | 3 (1.0)     | 2 (0.7)     | 1 (0.3)     | 0 (0.0)     | 3 (1.0)           | 0.325                        |
| <b>-2.2. Left ventricular dysfunction</b>         |               |             |             |             |             |             |                   |                              |
| Carboplatin/PLD                                   | 294<br>(100)  | 0 (0.0)     | 0 (0.0)     | 0 (0.0)     | 0 (0.0)     | 0 (0.0)     | 0 (0.0)           |                              |
| Trabectedin/PLD                                   | 303<br>(99.7) | 0 (0.0)     | 0 (0.0)     | 1 (0.3)     | 0 (0.0)     | 0 (0.0)     | 1 (0.3)           | 0.216                        |
| <b>-2.3. Palpitations</b>                         |               |             |             |             |             |             |                   |                              |
| Carboplatin/PLD                                   | 293<br>(99.7) | 1 (0.3)     | 0 (0.0)     | 0 (0.0)     | 0 (0.0)     | 0 (0.0)     | 0 (0.0)           |                              |
| Trabectedin/PLD                                   | 301<br>(99.0) | 1 (0.3)     | 2 (0.7)     | 0 (0.0)     | 0 (0.0)     | 0 (0.0)     | 0 (0.0)           | 0.172                        |
| <b>-2.4. Tachycardia</b>                          |               |             |             |             |             |             |                   |                              |
| Carboplatin/PLD                                   | 294<br>(100)  | 0 (0.0)     | 0 (0.0)     | 0 (0.0)     | 0 (0.0)     | 0 (0.0)     | 0 (0.0)           |                              |
| Trabectedin/PLD                                   | 302<br>(99.3) | 0 (0.0)     | 1 (0.3)     | 1 (0.3)     | 0 (0.0)     | 0 (0.0)     | 1 (0.3)           | 0.187                        |
| <b>-2.99. Other</b>                               |               |             |             |             |             |             |                   |                              |
| Carboplatin/PLD                                   | 294<br>(100)  | 0 (0.0)     | 0 (0.0)     | 0 (0.0)     | 0 (0.0)     | 0 (0.0)     | 0 (0.0)           |                              |
| Trabectedin/PLD                                   | 302<br>(99.3) | 0 (0.0)     | 1 (0.3)     | 0 (0.0)     | 1 (0.3)     | 0 (0.0)     | 1 (0.3)           | 0.290                        |
| <b>20. Skin and subcutaneous tissue disorders</b> |               |             |             |             |             |             |                   |                              |
| Carboplatin/PLD                                   | 230<br>(78.2) | 43 (14.6)   | 17 (5.8)    | 4 (1.4)     | 0 (0.0)     | 0 (0.0)     | 4 (1.4)           |                              |
| Trabectedin/PLD                                   | 229<br>(75.3) | 49 (16.1)   | 17 (5.6)    | 9 (3.0)     | 0 (0.0)     | 0 (0.0)     | 9 (3.0)           | 0.775                        |
| <b>-20.1. Alopecia</b>                            |               |             |             |             |             |             |                   |                              |
| Carboplatin/PLD                                   | 282<br>(95.9) | 11 (3.7)    | 1 (0.3)     | 0 (0.0)     | 0 (0.0)     | 0 (0.0)     | 0 (0.0)           |                              |
| Trabectedin/PLD                                   | 289<br>(95.1) | 15 (4.9)    | 0 (0.0)     | 0 (0.0)     | 0 (0.0)     | 0 (0.0)     | 0 (0.0)           | 0.423                        |
| <b>-20.10. Hyperhidrosis</b>                      |               |             |             |             |             |             |                   |                              |
| Carboplatin/PLD                                   | 293<br>(99.7) | 0 (0.0)     | 1 (0.3)     | 0 (0.0)     | 0 (0.0)     | 0 (0.0)     | 0 (0.0)           |                              |
| Trabectedin/PLD                                   | 301<br>(99.0) | 1 (0.3)     | 2 (0.7)     | 0 (0.0)     | 0 (0.0)     | 0 (0.0)     | 0 (0.0)           | 0.102                        |
| <b>-20.12. Nail disorder</b>                      |               |             |             |             |             |             |                   |                              |

|                                                           | G0<br>n (%)   | G1<br>n (%) | G2<br>n (%) | G3<br>n (%) | G4<br>n (%) | G5<br>n (%) | G3+G4+G5<br>n (%) | Chi-<br>squared for<br>trend |
|-----------------------------------------------------------|---------------|-------------|-------------|-------------|-------------|-------------|-------------------|------------------------------|
| Carboplatin/PLD                                           | 293<br>(99.7) | 1 (0.3)     | 0 (0.0)     | 0 (0.0)     | 0 (0.0)     | 0 (0.0)     | 0 (0.0)           |                              |
| Trabectedin/PLD                                           | 299<br>(98.4) | 4 (1.3)     | 1 (0.3)     | 0 (0.0)     | 0 (0.0)     | 0 (0.0)     | 0 (0.0)           |                              |
| <b>-20.13. Night sweats</b>                               |               |             |             |             |             |             |                   | 0.141                        |
| Carboplatin/PLD                                           | 293<br>(99.7) | 1 (0.3)     | 0 (0.0)     | 0 (0.0)     | 0 (0.0)     | 0 (0.0)     | 0 (0.0)           |                              |
| Trabectedin/PLD                                           | 300<br>(98.7) | 2 (0.7)     | 1 (0.3)     | 1 (0.3)     | 0 (0.0)     | 0 (0.0)     | 1 (0.3)           |                              |
| <b>-20.14. Palmar-plantar erythrodysesthesia syndrome</b> |               |             |             |             |             |             |                   | 0.111                        |
| Carboplatin/PLD                                           | 272<br>(92.5) | 12 (4.1)    | 9 (3.1)     | 1 (0.3)     | 0 (0.0)     | 0 (0.0)     | 1 (0.3)           |                              |
| Trabectedin/PLD                                           | 271<br>(89.1) | 17 (5.6)    | 11 (3.6)    | 5 (1.6)     | 0 (0.0)     | 0 (0.0)     | 5 (1.6)           |                              |
| <b>-20.15. Pigmentation disorder</b>                      |               |             |             |             |             |             |                   | 0.602                        |
| Carboplatin/PLD                                           | 289<br>(98.3) | 4 (1.4)     | 0 (0.0)     | 1 (0.3)     | 0 (0.0)     | 0 (0.0)     | 1 (0.3)           |                              |
| Trabectedin/PLD                                           | 299<br>(98.4) | 5 (1.6)     | 0 (0.0)     | 0 (0.0)     | 0 (0.0)     | 0 (0.0)     | 0 (0.0)           |                              |
| <b>-20.16. Pruritus</b>                                   |               |             |             |             |             |             |                   | 0.290                        |
| Carboplatin/PLD                                           | 287<br>(97.6) | 6 (2.0)     | 1 (0.3)     | 0 (0.0)     | 0 (0.0)     | 0 (0.0)     | 0 (0.0)           |                              |
| Trabectedin/PLD                                           | 301<br>(99.0) | 2 (0.7)     | 1 (0.3)     | 0 (0.0)     | 0 (0.0)     | 0 (0.0)     | 0 (0.0)           |                              |
| <b>-20.17. Purpura</b>                                    |               |             |             |             |             |             |                   | 0.309                        |
| Carboplatin/PLD                                           | 293<br>(99.7) | 1 (0.3)     | 0 (0.0)     | 0 (0.0)     | 0 (0.0)     | 0 (0.0)     | 0 (0.0)           |                              |
| Trabectedin/PLD                                           | 304<br>(100)  | 0 (0.0)     | 0 (0.0)     | 0 (0.0)     | 0 (0.0)     | 0 (0.0)     | 0 (0.0)           |                              |
| <b>-20.18. Rash</b>                                       |               |             |             |             |             |             |                   | 0.617                        |
| Carboplatin/PLD                                           | 287<br>(97.6) | 4 (1.4)     | 2 (0.7)     | 1 (0.3)     | 0 (0.0)     | 0 (0.0)     | 1 (0.3)           |                              |
| Trabectedin/PLD                                           | 295<br>(97.0) | 5 (1.6)     | 2 (0.7)     | 2 (0.7)     | 0 (0.0)     | 0 (0.0)     | 2 (0.7)           |                              |
| <b>-20.2. Catheter site erythema</b>                      |               |             |             |             |             |             |                   | 0.164                        |
| Carboplatin/PLD                                           | 294<br>(100)  | 0 (0.0)     | 0 (0.0)     | 0 (0.0)     | 0 (0.0)     | 0 (0.0)     | 0 (0.0)           |                              |
| Trabectedin/PLD                                           | 302<br>(99.3) | 2 (0.7)     | 0 (0.0)     | 0 (0.0)     | 0 (0.0)     | 0 (0.0)     | 0 (0.0)           |                              |
| <b>-20.20. Skin irritation</b>                            |               |             |             |             |             |             |                   | 0.309                        |
| Carboplatin/PLD                                           | 293<br>(99.7) | 1 (0.3)     | 0 (0.0)     | 0 (0.0)     | 0 (0.0)     | 0 (0.0)     | 0 (0.0)           |                              |
| Trabectedin/PLD                                           | 304<br>(100)  | 0 (0.0)     | 0 (0.0)     | 0 (0.0)     | 0 (0.0)     | 0 (0.0)     | 0 (0.0)           |                              |
| <b>-20.21. Skin toxicity</b>                              |               |             |             |             |             |             |                   | 0.041                        |
| Carboplatin/PLD                                           | 290<br>(98.6) | 4 (1.4)     | 0 (0.0)     | 0 (0.0)     | 0 (0.0)     | 0 (0.0)     | 0 (0.0)           |                              |
| Trabectedin/PLD                                           | 304<br>(100)  | 0 (0.0)     | 0 (0.0)     | 0 (0.0)     | 0 (0.0)     | 0 (0.0)     | 0 (0.0)           |                              |
| <b>-20.22 Urticaria</b>                                   |               |             |             |             |             |             |                   | 0.309                        |
| Carboplatin/PLD                                           | 293<br>(99.7) | 1 (0.3)     | 0 (0.0)     | 0 (0.0)     | 0 (0.0)     | 0 (0.0)     | 0 (0.0)           |                              |
| Trabectedin/PLD                                           | 304<br>(100)  | 0 (0.0)     | 0 (0.0)     | 0 (0.0)     | 0 (0.0)     | 0 (0.0)     | 0 (0.0)           |                              |
| <b>-20.5. Dermatitis</b>                                  |               |             |             |             |             |             |                   | 0.735                        |
| Carboplatin/PLD                                           | 291<br>(99.0) | 2 (0.7)     | 1 (0.3)     | 0 (0.0)     | 0 (0.0)     | 0 (0.0)     | 0 (0.0)           |                              |
| Trabectedin/PLD                                           | 302<br>(99.3) | 1 (0.3)     | 1 (0.3)     | 0 (0.0)     | 0 (0.0)     | 0 (0.0)     | 0 (0.0)           |                              |
| <b>-20.6. Dermatitis acneiform</b>                        |               |             |             |             |             |             |                   | 0.981                        |
| Carboplatin/PLD                                           | 293<br>(99.7) | 1 (0.3)     | 0 (0.0)     | 0 (0.0)     | 0 (0.0)     | 0 (0.0)     | 0 (0.0)           |                              |
| Trabectedin/PLD                                           | 303<br>(99.7) | 1 (0.3)     | 0 (0.0)     | 0 (0.0)     | 0 (0.0)     | 0 (0.0)     | 0 (0.0)           |                              |
| <b>-20.7. Dry skin</b>                                    |               |             |             |             |             |             |                   | 0.213                        |
| Carboplatin/PLD                                           | 281<br>(95.6) | 10 (3.4)    | 2 (0.7)     | 1 (0.3)     | 0 (0.0)     | 0 (0.0)     | 1 (0.3)           |                              |
| Trabectedin/PLD                                           | 294<br>(96.7) | 10 (3.3)    | 0 (0.0)     | 0 (0.0)     | 0 (0.0)     | 0 (0.0)     | 0 (0.0)           |                              |
| <b>-20.8. Erythema</b>                                    |               |             |             |             |             |             |                   | 0.686                        |
| Carboplatin/PLD                                           | 290<br>(98.6) | 3 (1.0)     | 1 (0.3)     | 0 (0.0)     | 0 (0.0)     | 0 (0.0)     | 0 (0.0)           |                              |



|                                               | G0<br>n (%)   | G1<br>n (%) | G2<br>n (%) | G3<br>n (%) | G4<br>n (%) | G5<br>n (%) | G3+G4+G5<br>n (%) | Chi-<br>squared for<br>trend |
|-----------------------------------------------|---------------|-------------|-------------|-------------|-------------|-------------|-------------------|------------------------------|
| Carboplatin/PLD                               | 292<br>(99.3) | 2 (0.7)     | 0 (0.0)     | 0 (0.0)     | 0 (0.0)     | 0 (0.0)     | 0 (0.0)           |                              |
| Trabectedin/PLD                               | 304<br>(100)  | 0 (0.0)     | 0 (0.0)     | 0 (0.0)     | 0 (0.0)     | 0 (0.0)     | 0 (0.0)           |                              |
| <b>-3.99. Other</b>                           |               |             |             |             |             |             |                   | 0.325                        |
| Carboplatin/PLD                               | 294<br>(100)  | 0 (0.0)     | 0 (0.0)     | 0 (0.0)     | 0 (0.0)     | 0 (0.0)     | 0 (0.0)           |                              |
| Trabectedin/PLD                               | 303<br>(99.7) | 0 (0.0)     | 0 (0.0)     | 1 (0.3)     | 0 (0.0)     | 0 (0.0)     | 1 (0.3)           |                              |
| <b>4. Eye disorders</b>                       |               |             |             |             |             |             |                   | 0.787                        |
| Carboplatin/PLD                               | 285<br>(96.9) | 9 (3.1)     | 0 (0.0)     | 0 (0.0)     | 0 (0.0)     | 0 (0.0)     | 0 (0.0)           |                              |
| Trabectedin/PLD                               | 299<br>(98.4) | 2 (0.7)     | 3 (1.0)     | 0 (0.0)     | 0 (0.0)     | 0 (0.0)     | 0 (0.0)           |                              |
| <b>-4.3. Photopsia</b>                        |               |             |             |             |             |             |                   | 0.309                        |
| Carboplatin/PLD                               | 293<br>(99.7) | 1 (0.3)     | 0 (0.0)     | 0 (0.0)     | 0 (0.0)     | 0 (0.0)     | 0 (0.0)           |                              |
| Trabectedin/PLD                               | 304<br>(100)  | 0 (0.0)     | 0 (0.0)     | 0 (0.0)     | 0 (0.0)     | 0 (0.0)     | 0 (0.0)           |                              |
| <b>-4.4. Vision blurred</b>                   |               |             |             |             |             |             |                   | 0.023                        |
| Carboplatin/PLD                               | 289<br>(98.3) | 5 (1.7)     | 0 (0.0)     | 0 (0.0)     | 0 (0.0)     | 0 (0.0)     | 0 (0.0)           |                              |
| Trabectedin/PLD                               | 304<br>(100)  | 0 (0.0)     | 0 (0.0)     | 0 (0.0)     | 0 (0.0)     | 0 (0.0)     | 0 (0.0)           |                              |
| <b>-4.99. Other</b>                           |               |             |             |             |             |             |                   | 0.368                        |
| Carboplatin/PLD                               | 290<br>(98.6) | 4 (1.4)     | 0 (0.0)     | 0 (0.0)     | 0 (0.0)     | 0 (0.0)     | 0 (0.0)           |                              |
| Trabectedin/PLD                               | 299<br>(98.4) | 2 (0.7)     | 3 (1.0)     | 0 (0.0)     | 0 (0.0)     | 0 (0.0)     | 0 (0.0)           |                              |
| <b>5. Gastrointestinal disorders</b>          |               |             |             |             |             |             |                   | 0.000                        |
| Carboplatin/PLD                               | 146<br>(49.7) | 66 (22.4)   | 61 (20.7)   | 20 (6.8)    | 1 (0.3)     | 0 (0.0)     | 21 (7.1)          |                              |
| Trabectedin/PLD                               | 116<br>(38.2) | 60 (19.7)   | 75 (24.7)   | 51 (16.8)   | 2 (0.7)     | 0 (0.0)     | 53 (17.4)         |                              |
| <b>-5.1. Abdominal discomfort</b>             |               |             |             |             |             |             |                   | 0.681                        |
| Carboplatin/PLD                               | 292<br>(99.3) | 1 (0.3)     | 1 (0.3)     | 0 (0.0)     | 0 (0.0)     | 0 (0.0)     | 0 (0.0)           |                              |
| Trabectedin/PLD                               | 302<br>(99.3) | 2 (0.7)     | 0 (0.0)     | 0 (0.0)     | 0 (0.0)     | 0 (0.0)     | 0 (0.0)           |                              |
| <b>-5.10. Tongue ulceration</b>               |               |             |             |             |             |             |                   | 0.309                        |
| Carboplatin/PLD                               | 293<br>(99.7) | 1 (0.3)     | 0 (0.0)     | 0 (0.0)     | 0 (0.0)     | 0 (0.0)     | 0 (0.0)           |                              |
| Trabectedin/PLD                               | 304<br>(100)  | 0 (0.0)     | 0 (0.0)     | 0 (0.0)     | 0 (0.0)     | 0 (0.0)     | 0 (0.0)           |                              |
| <b>-5.11. Flatulence</b>                      |               |             |             |             |             |             |                   | 0.187                        |
| Carboplatin/PLD                               | 294<br>(100)  | 0 (0.0)     | 0 (0.0)     | 0 (0.0)     | 0 (0.0)     | 0 (0.0)     | 0 (0.0)           |                              |
| Trabectedin/PLD                               | 302<br>(99.3) | 1 (0.3)     | 1 (0.3)     | 0 (0.0)     | 0 (0.0)     | 0 (0.0)     | 0 (0.0)           |                              |
| <b>-5.12. Gastritis</b>                       |               |             |             |             |             |             |                   | 0.506                        |
| Carboplatin/PLD                               | 291<br>(99.0) | 2 (0.7)     | 1 (0.3)     | 0 (0.0)     | 0 (0.0)     | 0 (0.0)     | 0 (0.0)           |                              |
| Trabectedin/PLD                               | 303<br>(99.7) | 0 (0.0)     | 1 (0.3)     | 0 (0.0)     | 0 (0.0)     | 0 (0.0)     | 0 (0.0)           |                              |
| <b>-5.13. Gastroesophageal reflux disease</b> |               |             |             |             |             |             |                   | 0.973                        |
| Carboplatin/PLD                               | 292<br>(99.3) | 2 (0.7)     | 0 (0.0)     | 0 (0.0)     | 0 (0.0)     | 0 (0.0)     | 0 (0.0)           |                              |
| Trabectedin/PLD                               | 302<br>(99.3) | 2 (0.7)     | 0 (0.0)     | 0 (0.0)     | 0 (0.0)     | 0 (0.0)     | 0 (0.0)           |                              |
| <b>-5.14. Gastrointestinal haemorrhage</b>    |               |             |             |             |             |             |                   | 0.981                        |
| Carboplatin/PLD                               | 293<br>(99.7) | 0 (0.0)     | 0 (0.0)     | 1 (0.3)     | 0 (0.0)     | 0 (0.0)     | 1 (0.3)           |                              |
| Trabectedin/PLD                               | 303<br>(99.7) | 0 (0.0)     | 0 (0.0)     | 1 (0.3)     | 0 (0.0)     | 0 (0.0)     | 1 (0.3)           |                              |
| <b>-5.15. Gastrointestinal pain</b>           |               |             |             |             |             |             |                   | 0.640                        |
| Carboplatin/PLD                               | 293<br>(99.7) | 0 (0.0)     | 0 (0.0)     | 1 (0.3)     | 0 (0.0)     | 0 (0.0)     | 1 (0.3)           |                              |
| Trabectedin/PLD                               | 300<br>(98.7) | 3 (1.0)     | 1 (0.3)     | 0 (0.0)     | 0 (0.0)     | 0 (0.0)     | 0 (0.0)           |                              |
| <b>-5.18. Haemorrhoids</b>                    |               |             |             |             |             |             |                   | 0.325                        |
| Carboplatin/PLD                               | 294<br>(100)  | 0 (0.0)     | 0 (0.0)     | 0 (0.0)     | 0 (0.0)     | 0 (0.0)     | 0 (0.0)           |                              |
| Trabectedin/PLD                               | 303<br>(99.7) | 1 (0.3)     | 0 (0.0)     | 0 (0.0)     | 0 (0.0)     | 0 (0.0)     | 0 (0.0)           |                              |

|                                                                | G0<br>n (%)   | G1<br>n (%) | G2<br>n (%) | G3<br>n (%) | G4<br>n (%) | G5<br>n (%) | G3+G4+G5<br>n (%) | Chi-<br>squared for<br>trend |
|----------------------------------------------------------------|---------------|-------------|-------------|-------------|-------------|-------------|-------------------|------------------------------|
| <b>-5.19. Ileus</b>                                            |               |             |             |             |             |             |                   | 0.309                        |
| Carboplatin/PLD                                                | 293<br>(99.7) | 0 (0.0)     | 0 (0.0)     | 1 (0.3)     | 0 (0.0)     | 0 (0.0)     | 1 (0.3)           |                              |
| Trabectedin/PLD                                                | 304<br>(100)  | 0 (0.0)     | 0 (0.0)     | 0 (0.0)     | 0 (0.0)     | 0 (0.0)     | 0 (0.0)           |                              |
| <b>-5.2. Abdominal distension</b>                              |               |             |             |             |             |             |                   | 0.036                        |
| Carboplatin/PLD                                                | 294<br>(100)  | 0 (0.0)     | 0 (0.0)     | 0 (0.0)     | 0 (0.0)     | 0 (0.0)     | 0 (0.0)           |                              |
| Trabectedin/PLD                                                | 299<br>(98.4) | 4 (1.3)     | 1 (0.3)     | 0 (0.0)     | 0 (0.0)     | 0 (0.0)     | 0 (0.0)           |                              |
| <b>-5.23. Nausea</b>                                           |               |             |             |             |             |             |                   | 0.000                        |
| Carboplatin/PLD                                                | 199<br>(67.7) | 53 (18.0)   | 35 (11.9)   | 7 (2.4)     | 0 (0.0)     | 0 (0.0)     | 7 (2.4)           |                              |
| Trabectedin/PLD                                                | 165<br>(54.3) | 59 (19.4)   | 52 (17.1)   | 27 (8.9)    | 1 (0.3)     | 0 (0.0)     | 28 (9.2)          |                              |
| <b>-5.28. Stomatitis</b>                                       |               |             |             |             |             |             |                   | 0.025                        |
| Carboplatin/PLD                                                | 265<br>(90.1) | 18 (6.1)    | 9 (3.1)     | 2 (0.7)     | 0 (0.0)     | 0 (0.0)     | 2 (0.7)           |                              |
| Trabectedin/PLD                                                | 262<br>(86.2) | 16 (5.3)    | 18 (5.9)    | 7 (2.3)     | 1 (0.3)     | 0 (0.0)     | 8 (2.6)           |                              |
| <b>-5.29. Subileus</b>                                         |               |             |             |             |             |             |                   | 0.172                        |
| Carboplatin/PLD                                                | 294<br>(100)  | 0 (0.0)     | 0 (0.0)     | 0 (0.0)     | 0 (0.0)     | 0 (0.0)     | 0 (0.0)           |                              |
| Trabectedin/PLD                                                | 302<br>(99.3) | 0 (0.0)     | 1 (0.3)     | 1 (0.3)     | 0 (0.0)     | 0 (0.0)     | 1 (0.3)           |                              |
| <b>-5.30. Vomiting</b>                                         |               |             |             |             |             |             |                   | 0.001                        |
| Carboplatin/PLD                                                | 242<br>(82.3) | 30 (10.2)   | 17 (5.8)    | 4 (1.4)     | 1 (0.3)     | 0 (0.0)     | 5 (1.7)           |                              |
| Trabectedin/PLD                                                | 217<br>(71.4) | 43 (14.1)   | 24 (7.9)    | 20 (6.6)    | 0 (0.0)     | 0 (0.0)     | 20 (6.6)          |                              |
| <b>-5.4. Abdominal pain</b>                                    |               |             |             |             |             |             |                   | 0.269                        |
| Carboplatin/PLD                                                | 283<br>(96.3) | 5 (1.7)     | 4 (1.4)     | 2 (0.7)     | 0 (0.0)     | 0 (0.0)     | 2 (0.7)           |                              |
| Trabectedin/PLD                                                | 286<br>(94.1) | 10 (3.3)    | 3 (1.0)     | 5 (1.6)     | 0 (0.0)     | 0 (0.0)     | 5 (1.6)           |                              |
| <b>-5.6. Constipation</b>                                      |               |             |             |             |             |             |                   | 0.131                        |
| Carboplatin/PLD                                                | 249<br>(84.7) | 28 (9.5)    | 16 (5.4)    | 1 (0.3)     | 0 (0.0)     | 0 (0.0)     | 1 (0.3)           |                              |
| Trabectedin/PLD                                                | 241<br>(79.3) | 41 (13.5)   | 20 (6.6)    | 2 (0.7)     | 0 (0.0)     | 0 (0.0)     | 2 (0.7)           |                              |
| <b>-5.7. Diarrhoea</b>                                         |               |             |             |             |             |             |                   | 0.441                        |
| Carboplatin/PLD                                                | 259<br>(88.1) | 21 (7.1)    | 10 (3.4)    | 4 (1.4)     | 0 (0.0)     | 0 (0.0)     | 4 (1.4)           |                              |
| Trabectedin/PLD                                                | 271<br>(89.1) | 24 (7.9)    | 6 (2.0)     | 3 (1.0)     | 0 (0.0)     | 0 (0.0)     | 3 (1.0)           |                              |
| <b>-5.8. Dyspepsia</b>                                         |               |             |             |             |             |             |                   | 0.416                        |
| Carboplatin/PLD                                                | 287<br>(97.6) | 5 (1.7)     | 2 (0.7)     | 0 (0.0)     | 0 (0.0)     | 0 (0.0)     | 0 (0.0)           |                              |
| Trabectedin/PLD                                                | 293<br>(96.4) | 8 (2.6)     | 3 (1.0)     | 0 (0.0)     | 0 (0.0)     | 0 (0.0)     | 0 (0.0)           |                              |
| <b>-5.9. Dysphagia</b>                                         |               |             |             |             |             |             |                   | 0.583                        |
| Carboplatin/PLD                                                | 293<br>(99.7) | 1 (0.3)     | 0 (0.0)     | 0 (0.0)     | 0 (0.0)     | 0 (0.0)     | 0 (0.0)           |                              |
| Trabectedin/PLD                                                | 302<br>(99.3) | 2 (0.7)     | 0 (0.0)     | 0 (0.0)     | 0 (0.0)     | 0 (0.0)     | 0 (0.0)           |                              |
| <b>-5.99. Other</b>                                            |               |             |             |             |             |             |                   | 0.743                        |
| Carboplatin/PLD                                                | 285<br>(96.9) | 4 (1.4)     | 5 (1.7)     | 0 (0.0)     | 0 (0.0)     | 0 (0.0)     | 0 (0.0)           |                              |
| Trabectedin/PLD                                                | 295<br>(97.0) | 2 (0.7)     | 6 (2.0)     | 1 (0.3)     | 0 (0.0)     | 0 (0.0)     | 1 (0.3)           |                              |
| <b>6. General disorders and administration site conditions</b> |               |             |             |             |             |             |                   | 0.003                        |
| Carboplatin/PLD                                                | 164<br>(55.8) | 66 (22.4)   | 51 (17.3)   | 12 (4.1)    | 0 (0.0)     | 1 (0.3)     | 13 (4.4)          |                              |
| Trabectedin/PLD                                                | 146<br>(48.0) | 60 (19.7)   | 66 (21.7)   | 29 (9.5)    | 3 (1.0)     | 0 (0.0)     | 32 (10.5)         |                              |
| <b>-6.1. Asthenia</b>                                          |               |             |             |             |             |             |                   | 0.031                        |
| Carboplatin/PLD                                                | 244<br>(83.0) | 23 (7.8)    | 26 (8.8)    | 1 (0.3)     | 0 (0.0)     | 0 (0.0)     | 1 (0.3)           |                              |
| Trabectedin/PLD                                                | 238<br>(78.3) | 23 (7.6)    | 33 (10.9)   | 9 (3.0)     | 1 (0.3)     | 0 (0.0)     | 10 (3.3)          |                              |
| <b>-6.10. Fatigue</b>                                          |               |             |             |             |             |             |                   | 0.538                        |
| Carboplatin/PLD                                                | 229<br>(77.9) | 36 (12.2)   | 22 (7.5)    | 7 (2.4)     | 0 (0.0)     | 0 (0.0)     | 7 (2.4)           |                              |



|                                       | G0<br>n (%)   | G1<br>n (%) | G2<br>n (%) | G3<br>n (%) | G4<br>n (%) | G5<br>n (%) | G3+G4+G5<br>n (%) | Chi-<br>squared for<br>trend |
|---------------------------------------|---------------|-------------|-------------|-------------|-------------|-------------|-------------------|------------------------------|
| Carboplatin/PLD                       | 286<br>(97.3) | 6 (2.0)     | 1 (0.3)     | 1 (0.3)     | 0 (0.0)     | 0 (0.0)     | 1 (0.3)           |                              |
| Trabectedin/PLD                       | 290<br>(95.4) | 8 (2.6)     | 4 (1.3)     | 2 (0.7)     | 0 (0.0)     | 0 (0.0)     | 2 (0.7)           |                              |
| <b>-7.4. Hepatotoxicity</b>           |               |             |             |             |             |             |                   | 0.000                        |
| Carboplatin/PLD                       | 278<br>(94.6) | 11 (3.7)    | 3 (1.0)     | 2 (0.7)     | 0 (0.0)     | 0 (0.0)     | 2 (0.7)           |                              |
| Trabectedin/PLD                       | 218<br>(71.7) | 9 (3.0)     | 19 (6.3)    | 48 (15.8)   | 10 (3.3)    | 0 (0.0)     | 58 (19.1)         |                              |
| <b>-7.99. Other</b>                   |               |             |             |             |             |             |                   | 0.325                        |
| Carboplatin/PLD                       | 294<br>(100)  | 0 (0.0)     | 0 (0.0)     | 0 (0.0)     | 0 (0.0)     | 0 (0.0)     | 0 (0.0)           |                              |
| Trabectedin/PLD                       | 303<br>(99.7) | 0 (0.0)     | 0 (0.0)     | 1 (0.3)     | 0 (0.0)     | 0 (0.0)     | 1 (0.3)           |                              |
| <b>8. Immune system disorders</b>     |               |             |             |             |             |             |                   | 0.151                        |
| Carboplatin/PLD                       | 281<br>(95.6) | 4 (1.4)     | 8 (2.7)     | 1 (0.3)     | 0 (0.0)     | 0 (0.0)     | 1 (0.3)           |                              |
| Trabectedin/PLD                       | 297<br>(97.7) | 2 (0.7)     | 5 (1.6)     | 0 (0.0)     | 0 (0.0)     | 0 (0.0)     | 0 (0.0)           |                              |
| <b>-8.3. Hypersensitivity</b>         |               |             |             |             |             |             |                   | 0.151                        |
| Carboplatin/PLD                       | 281<br>(95.6) | 4 (1.4)     | 8 (2.7)     | 1 (0.3)     | 0 (0.0)     | 0 (0.0)     | 1 (0.3)           |                              |
| Trabectedin/PLD                       | 297<br>(97.7) | 2 (0.7)     | 5 (1.6)     | 0 (0.0)     | 0 (0.0)     | 0 (0.0)     | 0 (0.0)           |                              |
| <b>9. Infections and infestations</b> |               |             |             |             |             |             |                   | 0.003                        |
| Carboplatin/PLD                       | 286<br>(97.3) | 3 (1.0)     | 3 (1.0)     | 1 (0.3)     | 1 (0.3)     | 0 (0.0)     | 2 (0.7)           |                              |
| Trabectedin/PLD                       | 277<br>(91.1) | 7 (2.3)     | 13 (4.3)    | 5 (1.6)     | 1 (0.3)     | 1 (0.3)     | 7 (2.3)           |                              |
| <b>-9.1. Candidiasis</b>              |               |             |             |             |             |             |                   | 0.325                        |
| Carboplatin/PLD                       | 294<br>(100)  | 0 (0.0)     | 0 (0.0)     | 0 (0.0)     | 0 (0.0)     | 0 (0.0)     | 0 (0.0)           |                              |
| Trabectedin/PLD                       | 303<br>(99.7) | 0 (0.0)     | 1 (0.3)     | 0 (0.0)     | 0 (0.0)     | 0 (0.0)     | 0 (0.0)           |                              |
| <b>-9.10. Pharyngitis</b>             |               |             |             |             |             |             |                   | 0.325                        |
| Carboplatin/PLD                       | 294<br>(100)  | 0 (0.0)     | 0 (0.0)     | 0 (0.0)     | 0 (0.0)     | 0 (0.0)     | 0 (0.0)           |                              |
| Trabectedin/PLD                       | 303<br>(99.7) | 1 (0.3)     | 0 (0.0)     | 0 (0.0)     | 0 (0.0)     | 0 (0.0)     | 0 (0.0)           |                              |
| <b>-9.11. Pneumonia</b>               |               |             |             |             |             |             |                   | 0.164                        |
| Carboplatin/PLD                       | 294<br>(100)  | 0 (0.0)     | 0 (0.0)     | 0 (0.0)     | 0 (0.0)     | 0 (0.0)     | 0 (0.0)           |                              |
| Trabectedin/PLD                       | 302<br>(99.3) | 0 (0.0)     | 0 (0.0)     | 2 (0.7)     | 0 (0.0)     | 0 (0.0)     | 2 (0.7)           |                              |
| <b>-9.12. Respiratory infection</b>   |               |             |             |             |             |             |                   | 0.053                        |
| Carboplatin/PLD                       | 294<br>(100)  | 0 (0.0)     | 0 (0.0)     | 0 (0.0)     | 0 (0.0)     | 0 (0.0)     | 0 (0.0)           |                              |
| Trabectedin/PLD                       | 300<br>(98.7) | 0 (0.0)     | 3 (1.0)     | 1 (0.3)     | 0 (0.0)     | 0 (0.0)     | 1 (0.3)           |                              |
| <b>-9.13. Sepsis</b>                  |               |             |             |             |             |             |                   | 0.696                        |
| Carboplatin/PLD                       | 292<br>(99.3) | 1 (0.3)     | 0 (0.0)     | 0 (0.0)     | 1 (0.3)     | 0 (0.0)     | 1 (0.3)           |                              |
| Trabectedin/PLD                       | 302<br>(99.3) | 0 (0.0)     | 0 (0.0)     | 1 (0.3)     | 0 (0.0)     | 1 (0.3)     | 2 (0.7)           |                              |
| <b>-9.15. Skin infection</b>          |               |             |             |             |             |             |                   | 0.325                        |
| Carboplatin/PLD                       | 294<br>(100)  | 0 (0.0)     | 0 (0.0)     | 0 (0.0)     | 0 (0.0)     | 0 (0.0)     | 0 (0.0)           |                              |
| Trabectedin/PLD                       | 303<br>(99.7) | 1 (0.3)     | 0 (0.0)     | 0 (0.0)     | 0 (0.0)     | 0 (0.0)     | 0 (0.0)           |                              |
| <b>-9.17. Urinary tract infection</b> |               |             |             |             |             |             |                   | 0.255                        |
| Carboplatin/PLD                       | 292<br>(99.3) | 0 (0.0)     | 2 (0.7)     | 0 (0.0)     | 0 (0.0)     | 0 (0.0)     | 0 (0.0)           |                              |
| Trabectedin/PLD                       | 298<br>(98.0) | 2 (0.7)     | 4 (1.3)     | 0 (0.0)     | 0 (0.0)     | 0 (0.0)     | 0 (0.0)           |                              |
| <b>-9.2. Catheter site infection</b>  |               |             |             |             |             |             |                   | 0.325                        |
| Carboplatin/PLD                       | 294<br>(100)  | 0 (0.0)     | 0 (0.0)     | 0 (0.0)     | 0 (0.0)     | 0 (0.0)     | 0 (0.0)           |                              |
| Trabectedin/PLD                       | 303<br>(99.7) | 1 (0.3)     | 0 (0.0)     | 0 (0.0)     | 0 (0.0)     | 0 (0.0)     | 0 (0.0)           |                              |
| <b>-9.5. Herpes virus infection</b>   |               |             |             |             |             |             |                   | 0.429                        |
| Carboplatin/PLD                       | 293<br>(99.7) | 1 (0.3)     | 0 (0.0)     | 0 (0.0)     | 0 (0.0)     | 0 (0.0)     | 0 (0.0)           |                              |
| Trabectedin/PLD                       | 302<br>(99.3) | 1 (0.3)     | 1 (0.3)     | 0 (0.0)     | 0 (0.0)     | 0 (0.0)     | 0 (0.0)           |                              |

|                            | <b>G0</b><br>n (%) | <b>G1</b><br>n (%) | <b>G2</b><br>n (%) | <b>G3</b><br>n (%) | <b>G4</b><br>n (%) | <b>G5</b><br>n (%) | <b>G3+G4+G5</b><br>n (%) | <b>Chi-squared for trend</b> |
|----------------------------|--------------------|--------------------|--------------------|--------------------|--------------------|--------------------|--------------------------|------------------------------|
| <b>-9.6. Herpes zoster</b> |                    |                    |                    |                    |                    |                    |                          | 0.513                        |
| Carboplatin/PLD            | 293<br>(99.7)      | 0 (0.0)            | 0 (0.0)            | 1 (0.3)            | 0 (0.0)            | 0 (0.0)            | 1 (0.3)                  |                              |
| Trabectedin/PLD            | 303<br>(99.7)      | 1 (0.3)            | 0 (0.0)            | 0 (0.0)            | 0 (0.0)            | 0 (0.0)            | 0 (0.0)                  |                              |
| <b>-9.7. Infection</b>     |                    |                    |                    |                    |                    |                    |                          | 0.254                        |
| Carboplatin/PLD            | 292<br>(99.3)      | 1 (0.3)            | 1 (0.3)            | 0 (0.0)            | 0 (0.0)            | 0 (0.0)            | 0 (0.0)                  |                              |
| Trabectedin/PLD            | 300<br>(98.7)      | 0 (0.0)            | 3 (1.0)            | 1 (0.3)            | 0 (0.0)            | 0 (0.0)            | 1 (0.3)                  |                              |
| <b>-9.8. Abscess</b>       |                    |                    |                    |                    |                    |                    |                          | 0.325                        |
| Carboplatin/PLD            | 294<br>(100)       | 0 (0.0)            | 0 (0.0)            | 0 (0.0)            | 0 (0.0)            | 0 (0.0)            | 0 (0.0)                  |                              |
| Trabectedin/PLD            | 303<br>(99.7)      | 0 (0.0)            | 0 (0.0)            | 1 (0.3)            | 0 (0.0)            | 0 (0.0)            | 1 (0.3)                  |                              |
| <b>-9.99. Other</b>        |                    |                    |                    |                    |                    |                    |                          | 0.180                        |
| Carboplatin/PLD            | 293<br>(99.7)      | 0 (0.0)            | 1 (0.3)            | 0 (0.0)            | 0 (0.0)            | 0 (0.0)            | 0 (0.0)                  |                              |
| Trabectedin/PLD            | 300<br>(98.7)      | 1 (0.3)            | 1 (0.3)            | 1 (0.3)            | 1 (0.3)            | 0 (0.0)            | 2 (0.7)                  |                              |



**Table s4. Quality of life - Change from baseline**

|                                 | Change<br>carboplatin/PLD<br>Mean (SD) | Change<br>trabectedin/PLD<br>Mean (SD) | Difference<br>trabectedin/PLD vs.<br>carboplatin/PLD<br>Mean (95%CI) |
|---------------------------------|----------------------------------------|----------------------------------------|----------------------------------------------------------------------|
| <b>QLQ-C30</b>                  | N=156                                  | N=170                                  |                                                                      |
| Global health status /QoL       | -4.4 (21.0)                            | -11.7 (25.4)                           | -7.3 (-12.4,-2.2)                                                    |
| <b>Functional scales</b>        |                                        |                                        |                                                                      |
| Physical functioning            | -8.5 (20.0)                            | -12.9 (22.6)                           | -4.3 (-9.0,0.4)                                                      |
| Role functioning                | -10.6 (27.1)                           | -15.1 (31.2)                           | -4.5 (-10.8,1.8)                                                     |
| Cognitive functioning           | -3.5 (17.4)                            | -4.9 (17.2)                            | -1.5 (-5.2,2.2)                                                      |
| Emotional functioning           | 2.4 (22.4)                             | 0.1 (23.1)                             | -2.4 (-7.3,2.5)                                                      |
| Social functioning              | -6.8 (27.0)                            | -10.6 (24.8)                           | -3.8 (-9.5,1.9)                                                      |
| <b>Symptom scales/items</b>     |                                        |                                        |                                                                      |
| Fatigue                         | 10.9 (23.2)                            | 19.1 (25.6)                            | 8.1 (2.8,13.4)                                                       |
| Nausea and vomiting             | 3.2 (23.0)                             | 11.0 (25.2)                            | 7.8 (2.5,13.1)                                                       |
| Pain                            | 0.3 (26.6)                             | 4.8 (27.5)                             | 4.4 (-1.5,10.3)                                                      |
| Dyspnoea                        | 6.5 (27.5)                             | 11.1 (29.3)                            | 4.6 (-1.7,10.9)                                                      |
| Insomnia                        | -0.2 (32.3)                            | -2.8 (27.9)                            | -2.6 (-9.3,4.1)                                                      |
| Appetite loss                   | 2.6 (28.1)                             | 15.2 (32.1)                            | 12.6 (5.9,19.3)                                                      |
| Constipation                    | 6.9 (31.0)                             | 6.9 (31.6)                             | 0 (-6.9,6.9)                                                         |
| Diarrhoea                       | 4.1 (23.0)                             | 0.6 (24.9)                             | -3.5 (-8.8,1.8)                                                      |
| Financial difficulties          | 1.5 (25.9)                             | 4.2 (22.4)                             | 2.7 (-2.6,8.0)                                                       |
| <b>QLQ-OV28</b>                 | N=159                                  | N=168                                  |                                                                      |
| <b>Functional scales</b>        |                                        |                                        |                                                                      |
| Body image                      | -3.1 (27.3)                            | -7.1 (29.2)                            | -3.9 (-10.2,2.4)                                                     |
| Sexuality                       | 1.9 (18.6)                             | 2.7 (19.7)                             | 0.8 (-3.5,5.1)                                                       |
| Attitude to disease/treatment   | 0.6 (28.8)                             | -7.7 (25.5)                            | -8.4 (-14.3,-2.5)                                                    |
| <b>Symptom scales/items</b>     |                                        |                                        |                                                                      |
| Abdominal/GI                    | 0.6 (17.6)                             | 2.4 (15.6)                             | 1.7 (-1.8,5.2)                                                       |
| Peripheral neuropathy           | 6.6 (23.0)                             | 9.6 (23.5)                             | 3 (-2.1,8.1)                                                         |
| Hormonal/ menopausal symptoms   | -1.5 (21.8)                            | 3.9 (26.6)                             | 5.4 (0.1,10.7)                                                       |
| Other chemotherapy side effects | 6.3 (17.7)                             | 10.4 (16.2)                            | 4 (0.3,7.7)                                                          |
| Hair loss                       | 7.9 (23.8)                             | 7.2 (28.2)                             | -0.6 (-6.3,5.1)                                                      |

**Legend:** SD: stadard deviation. 95%CI: 95% Confidence Interval

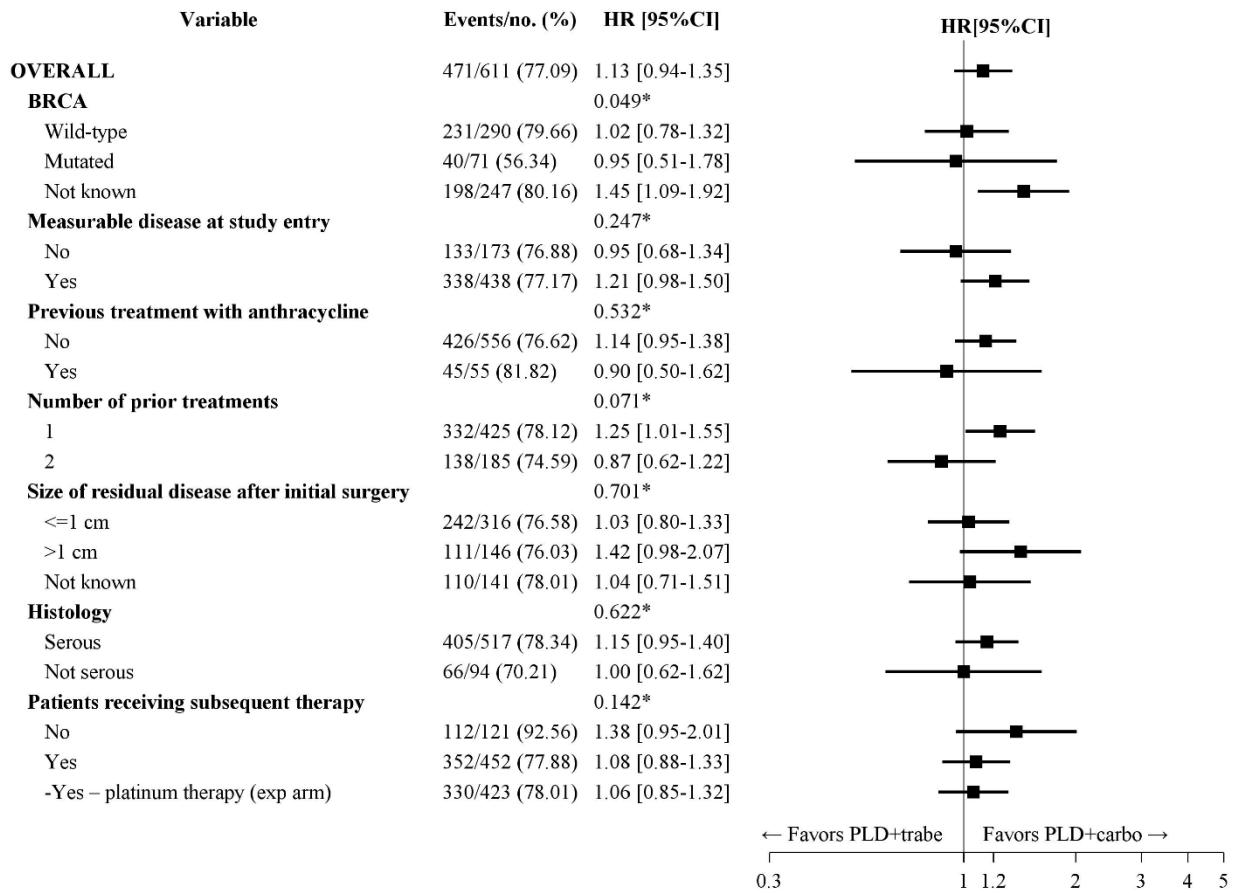

\* interaction test

**Figure s1. Forest plot of overall survival by subgroups**

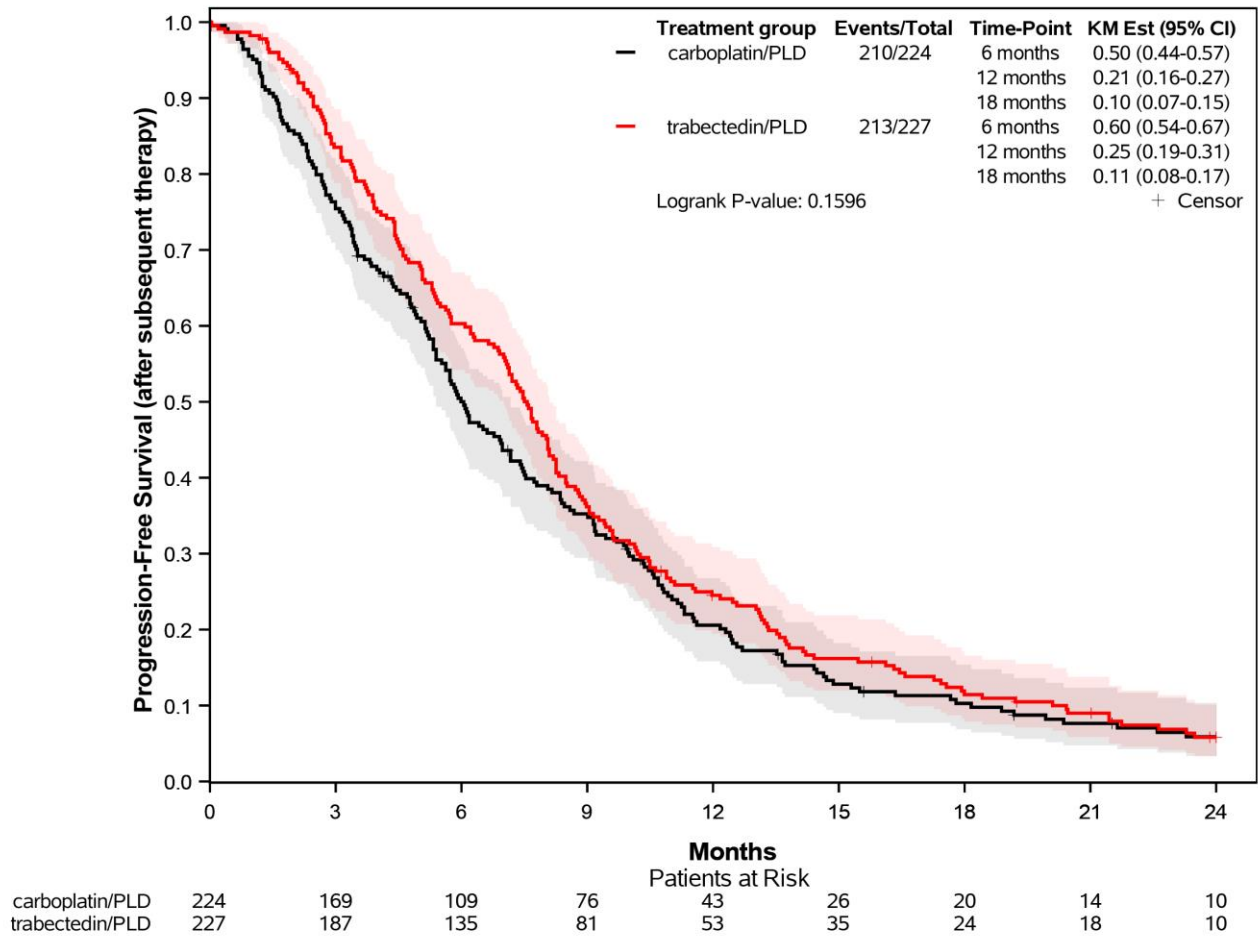

**Figure s2. Kaplan-Meier curves for progression-free survival after subsequent therapy (PFS-ST)**

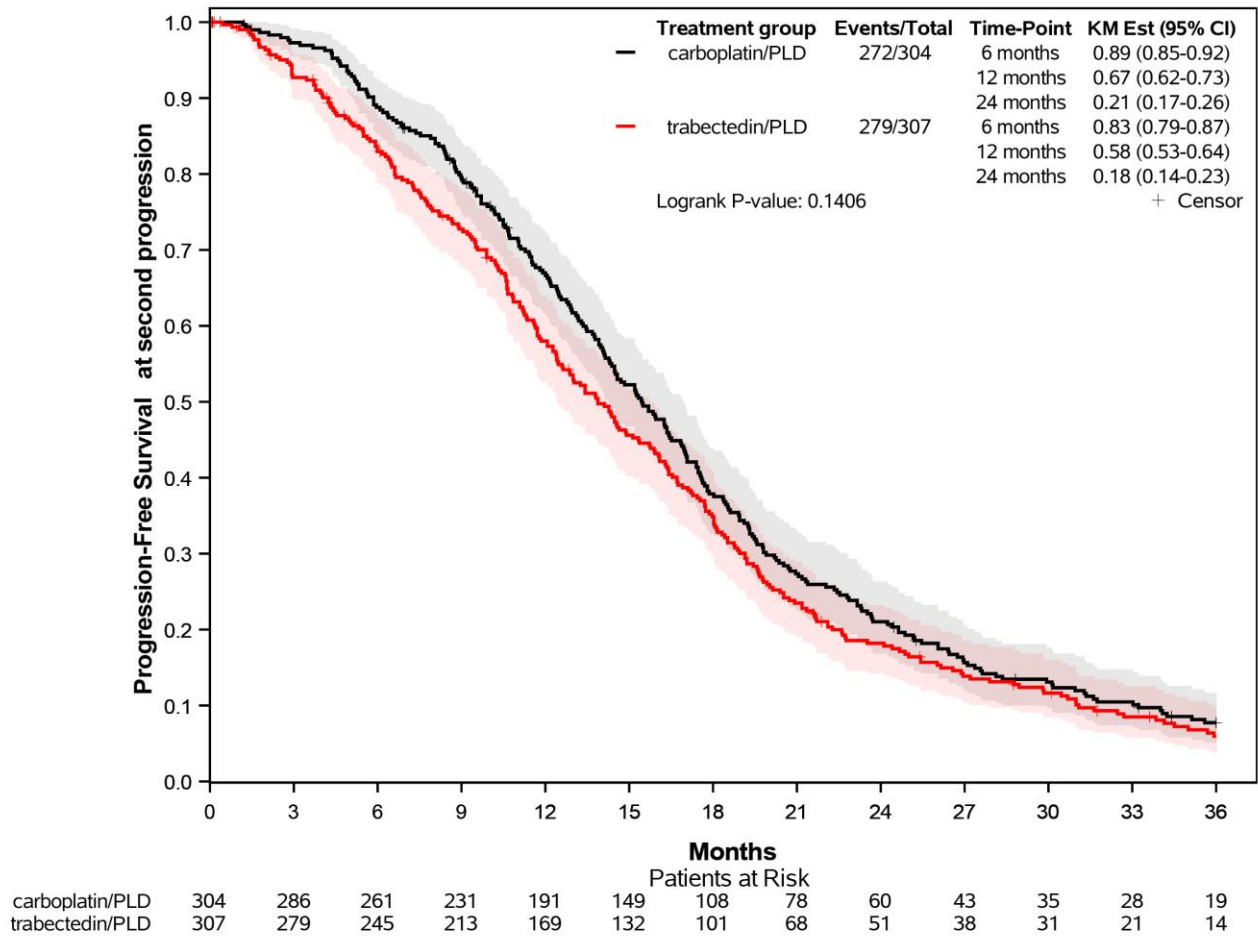

**Figure s3. Kaplan-Meier curves for progression-free survival at the second progression (PFS2)**

## Appendix A - INOVATYON study group

**Study Sponsor:** Elena Biagioli<sup>4</sup>, Roldano Fossati<sup>4</sup>, Eliana Rulli<sup>4</sup>, Giuseppe Funari<sup>4</sup>, Luciano Carlucci<sup>4</sup>, Davide Poli<sup>4</sup>, Paola Tonto<sup>4</sup>, Fabio Galli<sup>4</sup>, Maria Clara Caudana<sup>4</sup>, Chiara Carpentieri<sup>4</sup>, Elda Caccia<sup>4</sup>, Francesca Galli<sup>4</sup>.

### Mario Negri Gynecologic Oncology group-MaNGO (MaNGO)

Nicoletta Colombo<sup>1</sup>, Mariateresa Lapresa<sup>36</sup>, Gabriella Parma<sup>36</sup>, Abbondanza Montinaro<sup>36</sup>, Rita Liuzzi<sup>36</sup>, Caterina Parillo<sup>36</sup>, Angiolo Gadducci<sup>2</sup>, Stefania Cosio<sup>2</sup>, Giulia Tasca<sup>20</sup>, Maria Ornella Nicoletto<sup>20</sup>, Alessandra Baldoni<sup>20</sup>, Giulia Doria<sup>20</sup>, Giulietta Sinigaglia<sup>20</sup>, Germana Tognon<sup>22</sup>, Eliana Bignotti<sup>22</sup>, Martina Ratti<sup>22</sup>, Monica Ragnoli<sup>22</sup>, Valentina Zizioli<sup>22</sup>, Laura Zanotti<sup>22</sup>, Rossella Franzini<sup>22</sup>, Andrea De Censi<sup>24</sup>, Irene Maria Briata<sup>24</sup>, Silvia Giuliano<sup>24</sup>, Paola Zola<sup>26</sup>, Dionyssios Katsaros<sup>26</sup>, Fulvio Borella<sup>26</sup>, Emilie Marion Canuto<sup>26</sup>, Maria Elena Laudani<sup>26</sup>, Martina Barboni<sup>26</sup>, Elisa Piovano<sup>26</sup>, Elena Peirano<sup>26</sup>, Pierluigi Benedetti Panici<sup>27</sup>, Innocenza Palaia<sup>27</sup>, Federica Tomao<sup>27</sup>, Serena Boccia<sup>27</sup>, Claudia Marchetti<sup>27</sup>, Massimo Aglietta<sup>28</sup>, Giorgio Valabrega<sup>46</sup>, Eleonora Geninatti<sup>46</sup>, Cosimo Martino<sup>46</sup>, Marco Bonaudo<sup>46</sup>, Valentina Arcangeli<sup>29</sup>, Giuliana Drudi<sup>29</sup>, Claudio Zamagni<sup>30</sup>, Cinzia Pizzirani<sup>30</sup>, Daniela Rubino<sup>30</sup>, Alessandra Bologna<sup>31</sup>, Annalisa Berselli<sup>31</sup>, Erika Gervasi<sup>31</sup>, Roberta Gnoni<sup>31</sup>, Alessandro Bertolini<sup>37</sup>, Elisabetta Menatti<sup>37</sup>, Cinzia Caroti<sup>38</sup>, Milena Bruzzone<sup>38</sup>, Maurizio Cosso<sup>38</sup>, Barbara Rebesco<sup>38</sup>, Nicoletta Donadello<sup>39</sup>, Chiara Apolloni<sup>39</sup>, Gianna Di Costanzo<sup>40</sup>, Paola Curcio<sup>40</sup>, Francesco Giurlanda<sup>40</sup>, Silvia Violante<sup>40</sup>, Alberto Zaniboni<sup>41</sup>, Brunella Di Biasi<sup>41</sup>, Laura Zanotti<sup>41</sup>, Daniela Surico<sup>42</sup>, Roberta Buosi<sup>42</sup>, Paola Maggiora<sup>42</sup>, Gloria Borra<sup>42</sup>, Stefania Cresta<sup>42</sup>, Enrico Cortesi<sup>43</sup>, Alessandra Gargiulo<sup>43</sup>, Sofia Verkhouskaia<sup>43</sup>, Elena Zafarana<sup>44</sup>, Francesca Del Monte<sup>44</sup>, Vittorio Fusco<sup>45</sup>, Iolanda De Martino<sup>45</sup>, Lorenza Randi<sup>45</sup>, Giovanna Bellotti<sup>45</sup>, Laura Zavallone<sup>47</sup>, Elisa Perfetti<sup>47</sup>, Emanuela Reale<sup>47</sup>, Barbara Sartorello<sup>47</sup>, Mario Clerico<sup>47</sup>, Teresa Gamucci<sup>48</sup>, Filomena Narducci<sup>48</sup>, Silvia Quadrini<sup>48</sup>, Valentina Musacchi<sup>49</sup>, Luciana Babilonti<sup>49</sup>, Chiara Cassani<sup>49</sup>, Annamaria Ferrero<sup>50</sup>, Daniela Attianese<sup>50</sup>, Isabella Cipullo<sup>50</sup>, Michela Villa<sup>50</sup>, Enrico Badellino<sup>50</sup>, Elisa Tripodi<sup>50</sup>, Valentina Zanfagnin<sup>50</sup>, Luigi Cavanna<sup>51</sup>, Camilla Di Nunzio<sup>51</sup>, Claudia Biasini<sup>51</sup>, Livia Bidin<sup>51</sup>, Roberto Sabbatini<sup>52</sup>, Laura Casolari<sup>52</sup>, Elisa Pettorelli<sup>52</sup>, Ugo De Giorgi<sup>25</sup>, Monia Dall'Agata<sup>25</sup>, Giorgia Ravaglia<sup>25</sup>, Stefano Tamberi<sup>53</sup>, Alessandra Piancastelli<sup>53</sup>, Maria Rosa Gentili<sup>54</sup>, Enrico Campadelli<sup>54</sup>, Claudia Casanova<sup>54</sup>, Alessandra Piancastelli<sup>54</sup>, Grazia Artioli<sup>55</sup>, Silvia Coccato<sup>55</sup>, Antonio Ardizzoia<sup>56</sup>, Cristina Corbetta<sup>56</sup>, Carlo Curioni<sup>56</sup>, Alessandra Crippa<sup>56</sup>, Federica Villa<sup>56</sup>, Davide Pellizzoni<sup>56</sup>, Alessia Caldara<sup>57</sup>, Renza Triolo<sup>57</sup>, Zuzana Sirotova<sup>58</sup>, Giulia Courthod<sup>58</sup>, Cristina Barè<sup>58</sup>, Clelia Casartelli<sup>59</sup>, Anna Tusei<sup>59</sup>, Deborah Battagin<sup>59</sup>, Michele Aieta<sup>60</sup>, Antonella Lapenta<sup>60</sup>, Saverio Cinieri<sup>61</sup>, Margherita Cinefra<sup>61</sup>, Enrica Mazzoni<sup>61</sup>, Gabriella Del Bene<sup>61</sup>, Maria D'Amico<sup>61</sup>, Elvira De Marino<sup>62</sup>, Micol Caccianotti<sup>62</sup>, Stefania Gori<sup>63</sup>, Fabiana Marchetti<sup>63</sup>, Francesco Ferrau<sup>64</sup>, Claudia Masi<sup>64</sup>, Giovanna Antonelli<sup>64</sup>, Livio Blasi<sup>65</sup>, Massimiliano Alù<sup>65</sup>, Sabino De Placido<sup>66</sup>, Rossella Luria<sup>66</sup>, Cinzia Cardalesi<sup>66</sup>, Annalisa Ilardi<sup>66</sup>, Carlo Milandri<sup>67</sup>, Giuditta Zipoli<sup>67</sup>.

### Grupo Español de Investigación en Cáncer de Ovario (GEICO)

Cristina Churrua Galaz<sup>11</sup>, Maria Diez Zubizarreta<sup>11</sup>, Ana Paísán Ruiz<sup>11</sup>, Koro Andueza Granados<sup>11</sup>, Nerea Ancizar Lizarraga<sup>11</sup>, Isabel Alvarez Lopez<sup>11</sup>, Maria Pilar Barretina<sup>15</sup>, Mertitxell Rigola<sup>15</sup>, Francesca Llopis<sup>15</sup>, Blanca Martinez<sup>15</sup>, Begoña Martín<sup>15</sup>, Samiha Saidani<sup>15</sup>, Isabel Bover<sup>18</sup>, Juan Coves<sup>18</sup>, Sabina Soler<sup>18</sup>, Sergio Ayuga<sup>18</sup>, Maria Iglesias<sup>18</sup>, Margarita Romeo<sup>19</sup>, Diana Roa<sup>19</sup>, Jose Luis Cuadra<sup>19</sup>, Isabel Gomez<sup>19</sup>, Judith Rodriguez Moreno<sup>19</sup>, Christian Querol Orgaz<sup>19</sup>, Eugenia López Sanchez<sup>19</sup>, Beatriz Pardo<sup>21</sup>, Marta Pamias Noguè<sup>21</sup>, Marta Gil Martín<sup>21</sup>, Jokin Yllera Retegui<sup>21</sup>, Maria Jesus Rubio<sup>23</sup>, Maria Jose Marín<sup>23</sup>, Manuel Rejano Castaneda<sup>23</sup>, Juan Parras<sup>23</sup>, Rebecca Pavon Gomez<sup>23</sup>, Maria Pilar Mesa Blanco<sup>23</sup>, Andrés Poveda<sup>35</sup>, Ignacio Romero<sup>35</sup>, Gema Piqueres<sup>35</sup>, Maria Muntaner<sup>35</sup>, Pedro Mallol<sup>35</sup>, Carlos Peris<sup>35</sup>, Ana Santaballa<sup>68</sup>, Laura Palomar<sup>68</sup>, Helena de la Cueva<sup>68</sup>, Marian Lavin<sup>68</sup>, Raúl Márquez<sup>69</sup>, Antonio Gonzalez Martin<sup>69</sup>, Raquel Bratos<sup>69</sup>, Marta Gutierrez<sup>69</sup>, Ana Cortijo<sup>69</sup>, Jesus Alarcon<sup>70</sup>, Aranzazu Gonzalez Del Alba<sup>70</sup>, Antonia Perello<sup>70</sup>, Marga Oliver<sup>70</sup>, Cristina Caballero Diaz<sup>71</sup>, Ana Blasco<sup>71</sup>, Virginia Palomar<sup>71</sup>, Francisco García<sup>71</sup>, Rosa Monfort<sup>71</sup>, Vicente Castellano<sup>71</sup>, Teresa Fernandez<sup>71</sup>, Nuria Ruiz Miravet<sup>72</sup>, Regina Romero<sup>72</sup>, Llorens, Kavita Gandhi Morar<sup>72</sup>, Francisco Garcia Pinon<sup>72</sup>, Javier Munarriz Ferrandis<sup>72</sup>, Gema Gimeno Mateu<sup>72</sup>, Eugenia Ortega<sup>73</sup>, Ruben Tejero<sup>73</sup>, Marina Pardina<sup>73</sup>, Laura Runi Carrera<sup>73</sup>, Angels Arcusa Lanza<sup>74</sup>, Carme Aracil<sup>74</sup>, Luis Fernandez<sup>74</sup>, Meritxell Vilanova<sup>74</sup>, Nuria Barragan<sup>74</sup>, Manuela Gonzalez Navarro<sup>74</sup>, Silvia Catot Tort<sup>75</sup>, Alba Tubau Rosell<sup>75</sup>, Mireia Porquet Prat<sup>75</sup>, Irene Oller Sales<sup>75</sup>, Elena Garcia Martinez<sup>76</sup>, Jose Antonio Lopez Oliva<sup>76</sup>, Elisa Garcia Garre<sup>76</sup>, Francisco Ayala de la Pena<sup>76</sup>, M.Dolores Najera Perez<sup>76</sup>, Jumia Pina Mingorance<sup>76</sup>, Regina Girones<sup>77</sup>, Carmen Salvador<sup>77</sup>, Isabel Navarro Cortina<sup>77</sup>, M Angeles Lopez Montenegro Soria<sup>77</sup>, Elisa Marti Beneito<sup>77</sup>, Yolanda Garcia<sup>78</sup>, Mercè Abad<sup>78</sup>, Miquel Cruel<sup>78</sup>, Irene López<sup>78</sup>, Evelyn Herrera<sup>78</sup>, Cesar Mendiola<sup>79</sup>, Luis Manso, Rosa Rodriguez<sup>79</sup>, Ana Beatriz Sanchez<sup>80</sup>, Teresa Quintanar<sup>80</sup>, Rosana Perea<sup>80</sup>, Eric Campello<sup>80</sup>, Elena Garcia Martinez<sup>81</sup>, Jose Antonio Lopez Oliva<sup>81</sup>, Elisa Garcia Garre<sup>81</sup>, Francisco Ayala de la Pena<sup>81</sup>, M.Dolores Najera Perez<sup>81</sup>, Jumia Pina Mingorance<sup>81</sup>.

## **North-Eastern-German Society of Gynaecological Oncology (NOGGO)**

Jalid Sehouli<sup>3</sup>, Radoslav Chekerov<sup>3</sup>, Mustafa Deryal<sup>16</sup>, Mira Ebner<sup>16</sup>, Kathrin Alt<sup>16</sup>, Ulrike Schilling<sup>16</sup>, Pauline Wimberger<sup>34</sup>, Ulrich Canzler<sup>86</sup>, Christine Leffler<sup>86</sup>, Christine Griebisch<sup>86</sup>, Bettina Epperlein<sup>86</sup>, Karolin Franke<sup>86</sup>, Helen Urban<sup>86</sup>, Helen Krieger<sup>86</sup>, Elena Ioana Braicu<sup>82</sup>, Nils Leiminger<sup>82</sup>, Isil Yalcinkaya<sup>82</sup>, Georg Heinrich<sup>83</sup>, Christiane Richter-Ehrenstein<sup>83</sup>, Evelyn Mende<sup>83</sup>, Cindy Drewitz<sup>83</sup>, Ingo Runnebaum<sup>84</sup>, Matthias Rengsberger<sup>84</sup>, Jorge Jimenez Cruz<sup>84</sup>, Marc Radosa<sup>84</sup>, Beate Ludwig<sup>84</sup>, Sven Mahner<sup>85</sup>, Volkmar Müller<sup>85</sup>, Natasha Gaskill<sup>85</sup>, Natasha Gaskill<sup>85</sup>, Esther Freese<sup>85</sup>, Sandra Bertram-Schemmel<sup>85</sup>, Sylke Krenkel<sup>85</sup>, Barbara Schmalfeldt<sup>85</sup>, Fabian Trillsch<sup>85</sup>, Gülten Oskay-Özcelik<sup>87</sup>, Hans-Joachim Hindenburg<sup>87</sup>, Simone Diepold<sup>87</sup>, Gülizar Yurtseven<sup>87</sup>, Angret Wetzel<sup>87</sup>, Maike de Wit<sup>88</sup>, Gerd Büschel<sup>88</sup>, Dorothea Scholz<sup>88</sup>, Winfried Rothaug<sup>88</sup>, Gersbacher-Runge<sup>88</sup>, Eva-Maria Grischke<sup>89</sup>, Christian Gall<sup>89</sup>, Emily Irlinger<sup>89</sup>, Yvonne Löffler<sup>89</sup>, Eva Stauß<sup>89</sup>, Dirk Bauerschlag<sup>90</sup>, Nadine Sallach<sup>90</sup>, Gesa Voss<sup>90</sup>, Antje Hempel<sup>90</sup>, Christian Schem<sup>90</sup>, Florian Heitz<sup>91</sup>, Philipp Harter<sup>91</sup>, Andreas du Bois<sup>91</sup>, Claudia Nölling<sup>91</sup>, Anna Zarebski<sup>91</sup>, Belinda Borrmann<sup>91</sup>, Karin Hellmann<sup>91</sup>, Alexander Mustea<sup>92</sup>, Dominique Koensgen- Mustea<sup>92</sup>, Franziska Schindler<sup>92</sup>, Katharina Stips<sup>92</sup>, Antje Belau<sup>92</sup>, Tanja Fehm<sup>93</sup>, Markus Fleisch<sup>93</sup>, Melanie Kruppa<sup>93</sup>, Astrid Grosssteinbeck<sup>93</sup>, Ulrike Kreimer<sup>93</sup>, Thomas Kaleta<sup>93</sup>, Karin Reichert<sup>93</sup>, Mely Baum<sup>93</sup>, Eugen Ruckhäberle<sup>93</sup>, Andrea Heider<sup>94</sup>, Dagmar Sent<sup>94</sup>, Vera Heidrich<sup>94</sup>, Jeanette Zimmermann<sup>94</sup>, Max Dieterich<sup>95</sup>, Juliane Terpe<sup>95</sup>, Beatrice Engel<sup>95</sup>, Michaela Stecher<sup>95</sup>, Martina Groop-Meier<sup>96</sup>, Thomas Decker<sup>96</sup>, Irina Gossen<sup>96</sup>, Christina Strobel<sup>96</sup>, Marco Battista<sup>97</sup>, Marcus Schmidt<sup>97</sup>, Martina Seehase<sup>97</sup>, Bettina Al-Kadi<sup>97</sup>, Achim Woeckel<sup>98</sup>, Mathias Krockenberger<sup>98</sup>, Daniel Herr<sup>98</sup>, Elisabeth Thees<sup>98</sup>, Katrin Erdmann<sup>98</sup>, Ivo Meinhold-Heerlein<sup>99</sup>, Tomas Kupec<sup>99</sup>, Julia Serno<sup>99</sup>, Gertrud Strauch<sup>99</sup>.

## **NHS National Services Scotland**

Ana Montes<sup>7</sup>, Malahat Khaul<sup>7</sup>, Lisa Ng<sup>7</sup>, Shifa Belul<sup>7</sup>, Abhijit Jadhav<sup>7</sup>, Agnieszka Zielonka<sup>7</sup>, Veronica D'Alessandro<sup>7</sup>, Sara Lombardi<sup>7</sup>, Rebecca Herbertson<sup>14</sup>, Isabelle Coombes<sup>14</sup>, Catherine Hunter<sup>14</sup>, Emily Peasgood<sup>14</sup>, Sara Hawkins<sup>14</sup>, Kirsty Bracewell<sup>14</sup>, Sara Hawkins<sup>100</sup>, Carolyn Noren<sup>100</sup>, Raquel Marcos Gomez<sup>100</sup>, Tan Tsawayo<sup>100</sup>, Jeanette Gilbert<sup>100</sup>, Marian Flynn-Batham<sup>100</sup>, Rachel Jones<sup>101</sup>, Charlotte Young<sup>101</sup>, Amanda Jackson<sup>101</sup>, Kathy Bishop<sup>101</sup>, Chaterine Watkins<sup>101</sup>, Jayne Richards<sup>101</sup>, Emma Hudson<sup>101</sup>, Louise Hanna<sup>101</sup>, Anila Parveen<sup>101</sup>, Rebecca Bowen<sup>102</sup>, Samantha Curtis<sup>102</sup>, Thomas Tylee<sup>102</sup>, Tania Allen<sup>102</sup>, Michael Daly<sup>102</sup>.

## **Belgian Gynaecological Oncology Group (BGOG)**

Lionel D'Hondt<sup>103</sup>, Geraldine Mineur<sup>103</sup>, Cossette Sanchez<sup>103</sup>, Frederic Bellemans<sup>103</sup>, Ignace Vergote<sup>10</sup>, Leen Trappeniers<sup>104</sup>, Daisy Supply<sup>104</sup>, Marijke Gaekens<sup>104</sup>, Peter Vuylsteke<sup>105</sup>, Dominique Crasson<sup>105</sup>, Stéphanie Henry<sup>105</sup>, Caroline Yague Sanz<sup>105</sup>, Christof Vulsteke<sup>106</sup>, An Casneuf<sup>106</sup>, Iris Kyle-Leinhase<sup>106</sup>, Mieke Van Den Berghe<sup>106</sup>.

## **Dutch Gynaecological Oncology Group (DGOG)**

Petronella Beatrix Ottevanger<sup>8</sup>, Elvira Spoelman-Hecker<sup>8</sup>, Claudia vanKerkhof-Peters<sup>8</sup>, Anita Huisman<sup>8</sup>, Geert Jan van der Goor<sup>8</sup>, AM Westermann<sup>32</sup>, Lyda ter Hofstede<sup>32</sup>, E.H. Van Daalen<sup>32</sup>, Fioole Lisanne<sup>32</sup>, Frank Abe Nijenhuis<sup>32</sup>, J.M. Tromp<sup>32</sup>.

## **Swiss Group for Clinical Cancer Research (SAKK)**

Cristiana Sessa<sup>6</sup>, Giancarla Busi<sup>6</sup>, Sheila Gaggetta<sup>6</sup>, Anastasios Stathis<sup>6</sup>, Gaia Griguolo<sup>6</sup>, Sabine Van Den Bosch<sup>6</sup>, Laura Moser<sup>6</sup>, Massimiliano Salati<sup>6</sup>, Lorenzo Rossi<sup>6</sup>, Marco Pasqualotto<sup>6</sup>, Luca Canziani<sup>6</sup>, Vanessa Escudero<sup>6</sup>, Marco Maria Aiello<sup>6</sup>, Barbara Muoio<sup>6</sup>, Mara Mantiero<sup>6</sup>, Chiara Cerrato<sup>6</sup>, Lorenzo Baldecchi<sup>6</sup>, Juliana Datrocinio Ferreira<sup>6</sup>, Salome Riniker<sup>13</sup>, Brigitte Künzle<sup>13</sup>, Anja Harder<sup>13</sup>, Patrik Weder<sup>13</sup>, Ursula Hasler-Strub<sup>13</sup>, Thomas Ruhstaller<sup>13</sup>, Belinda Germann<sup>13</sup>, Beat Thürlimann<sup>13</sup>, Stefan Diem<sup>13</sup>, Ulrich Güller<sup>13</sup>, Ruth Demmer<sup>13</sup>, Jeanine Kehl<sup>13</sup>, Bogumila Pfister<sup>13</sup>, Nanda Meister<sup>13</sup>, Sabine Schmid<sup>13</sup>, Lotus Desbiolles<sup>13</sup>, Aurelius Omlin<sup>13</sup>, Christina Appenzeller<sup>13</sup>, Stefanie Fischer<sup>13</sup>, Patrizia Niedermann<sup>13</sup>, Angelika Bickel<sup>13</sup>, Claudio Thurneysen<sup>13</sup>, Viola Heinzelmann<sup>33</sup>, Marcus Vetter<sup>33</sup>, Doris Weber<sup>33</sup>, Ute Heisner<sup>33</sup>, Mirjam Maier<sup>33</sup>, Andrea Junghans<sup>33</sup>, Edward Wignt<sup>33</sup>, Martina Machacek<sup>33</sup>, Fabienne Schwab<sup>33</sup>, Brigitta Kautz<sup>33</sup>, Rozolita Sejdini<sup>33</sup>, Roger Von Moos<sup>107</sup>, Franziska Hellmann<sup>107</sup>, Gillian Roberts<sup>107</sup>, Michael Mark<sup>107</sup>, Sara Bastian<sup>107</sup>, Gabriela Manetsch<sup>107</sup>, Radmila Moudry<sup>107</sup>, Karin Hohloch<sup>107</sup>, Sabrina Zortea<sup>107</sup>, Michael Schwitter<sup>107</sup>, Tobias Freyholdt<sup>107</sup>, Gisela Mayer<sup>107</sup>, Alexandra Jori<sup>107</sup>, Nadine Kowel-Beh<sup>107</sup>, Katrin Oppel<sup>107</sup>, Stefan Greuter<sup>107</sup>, Elena Kralidis<sup>108</sup>, Elias Widmer<sup>108</sup>, Sabine Hunziker<sup>108</sup>, Stephanie Aaltola<sup>108</sup>, Christoph Mamot<sup>108</sup>, Peter Moosmann<sup>108</sup>, Alexander Schreiber<sup>108</sup>, Angela Wolf<sup>108</sup>, Ramona Olivia Merki<sup>108</sup>, Wolf-Dieter Janthur<sup>108</sup>, Ralph Zachariah-Gerber<sup>108</sup>, Therese Gurtner<sup>108</sup>, Julia Püschel<sup>108</sup>, Stefanie Hetzenecker<sup>108</sup>, Tobias Wehrhahn<sup>108</sup>, Yvonne Meier<sup>108</sup>, Kathrin Schmutz<sup>108</sup>, Anna Nowicka<sup>108</sup>, Constanze Spelters<sup>108</sup>, Denise Marini<sup>108</sup>, Michael Mueller<sup>109</sup>, Juliette Wanner<sup>109</sup>, Manuela Rabaglio<sup>109</sup>, Urban Novak<sup>109</sup>, Veronika Pasquinelli<sup>109</sup>, Martin Zweifel<sup>109</sup>, Silvia Imboden<sup>109</sup>, Y. Chittzhatun Keveian<sup>109</sup>, Barbara Rohrbach<sup>109</sup>, Stefan Aebi<sup>110</sup>, Stephanie Largiadèr<sup>110</sup>, Evelyn Rickenbacher<sup>110</sup>, Ralph Winterhalder<sup>110</sup>, Marcel Zefferer<sup>110</sup>, Violetta Powajbo<sup>110</sup>, Daniela Weiler<sup>110</sup>, Catrina Uhlmann Nussbaum<sup>111</sup>, Walter Mingrone<sup>111</sup>, Manuel Jungi<sup>111</sup>, Therese Gurtner<sup>111</sup>, Monique Hartmann<sup>111</sup>, Céline Stäuble<sup>111</sup>, Francina Hartmann<sup>111</sup>, Mathias Fehr<sup>112</sup>, Patricia Städele<sup>112</sup>, Joellen Welter<sup>112</sup>, Lea Köchli<sup>112</sup>, Regula Jung<sup>112</sup>, Wieland Sell<sup>112</sup>, Alexander Scheffzek<sup>112</sup>, Nicole Homburg<sup>112</sup>, Mareike

Göranson<sup>112</sup>, Birgit Luther<sup>112</sup>, Andreas Müller<sup>113</sup>, Beatrice Brinkers<sup>113</sup>, Martina Pfitzner<sup>113</sup>, Miklos Pless<sup>113</sup>, Melanie Löffler<sup>113</sup>, Natalie Fischer<sup>113</sup>, Martin Kaelin<sup>113</sup>, Sabina Schacher<sup>113</sup>, Saskia Herrlich<sup>113</sup>, Laetitia Mauti<sup>113</sup>, Christian Taverna<sup>114</sup>, Susan Baumann<sup>114</sup>, Roman Inauen<sup>114</sup>, Christina Schneider Taverna<sup>114</sup>, Katrin Furrer<sup>114</sup>, Franziska Borer<sup>114</sup>, Sonja Burkhalter<sup>114</sup>, Sarah Reich<sup>114</sup>, Blanca Brandes<sup>114</sup>, Rahel Hein<sup>114</sup>, Barbara Heinzer<sup>114</sup>, Annette Park<sup>114</sup>, Simone Schlegel<sup>114</sup>, Julia Schmidtschneider<sup>114</sup>, Rita Tast<sup>114</sup>, Elisabeth Thalmann Fauser<sup>114</sup>, Evelin Veres<sup>114</sup>.

### **Nordic Society of Gynaecological Oncology (NSGO)**

National PI: Mansoor Raza Mirza<sup>17</sup>

Johanna Mäenpää<sup>5</sup>, Sami Saarelainen<sup>5</sup>, Maarit Vuento<sup>5</sup>, Susanna Honkonen<sup>5</sup>, Heidi Kiiskinen<sup>5</sup>, Gitte-Bettina Nyvang<sup>12</sup>, Annemieke Sibtsen<sup>12</sup>, Tina Vinsten Clausen<sup>12</sup>, Gunnar B. Kristensen<sup>115</sup>, Hege L Rasmussen<sup>115</sup>, Iselin B. Broen<sup>115</sup>, Karin Skogfjord<sup>115</sup>, Per Arne Stensager<sup>115</sup>, Anne Gry Bentzen<sup>116</sup>, Gunn-Janne Paulsen<sup>116</sup>, Kristin Iren Jensen<sup>116</sup>, Anne Beate Vereide<sup>116</sup>, Bent Fiane<sup>117</sup>, Aase Merete Thuen<sup>117</sup>, Tove Buhl<sup>117</sup>, Ulla Puistola<sup>118</sup>, Paivi Marttila<sup>118</sup>, Paula Vaisanen<sup>118</sup>, Marja Simojoki<sup>118</sup>, Marianne Hinkula<sup>118</sup>, Maarit Anttila<sup>119</sup>, Marja Komulainen<sup>119</sup>, Elina Puumalainen<sup>119</sup>, Helena Oksa<sup>119</sup>, Marjukka Sallien<sup>119</sup>, Jatta Jokinen<sup>119</sup>, Heli Riepponen<sup>119</sup>, Heli Leinonen<sup>119</sup>.

### **AGO Studienzentrale (AGO-Austria)**

Christian Marth<sup>9</sup>, Alain Zeimet<sup>9</sup>, Daniel Reimer<sup>9</sup>, Jasmina Suljkanovic<sup>9</sup>, Regina Berger<sup>9</sup>, Angela Riha<sup>9</sup>, Irina Tsubulak<sup>9</sup>, Edgar Petru<sup>120</sup>, Hermann Fuchs<sup>120</sup>, Birgit Wunsch<sup>120</sup>, Angelika Lanz-Veit<sup>120</sup>, Herta Schaffernak<sup>120</sup>, Christoph Benedicic<sup>120</sup>, Christian Schauer<sup>121</sup>, Barbara Herritsch<sup>121</sup>, Gabriele Moitzi<sup>121</sup>, Carmen Siebenhofer<sup>121</sup>, Bettina Werlitsch<sup>121</sup>, Patrick Greimel<sup>121</sup>, Alexander Reinhaller<sup>122</sup>, Stephan Polterauer<sup>122</sup>, Franziska Riedl<sup>122</sup>, Christoph Grimm<sup>122</sup>, Stefanie Aust<sup>122</sup>, Veronika Seebacher<sup>122</sup>, Richard Schwameis<sup>122</sup>.

### **National coordinators**

Marianne Linkels<sup>8</sup>, Regina Berger<sup>9</sup>, Angela Riha<sup>9</sup>, Kirsten Murray<sup>123</sup>, Jackie Burns<sup>123</sup>, Ana Levin<sup>124</sup>, Maren Keller<sup>125</sup>, Simone Wyss<sup>126</sup>, Michaela Werfeli<sup>126</sup>, Line Seierøe Ulbæk<sup>127</sup>, Sanne Lindberg<sup>127</sup>.

1 Gynecologic Cancer Program, European Institute of Oncology IRCCS and University of Milan-Bicocca, Milan, Italy. 2 Clinical and Experimental Medicine, Division of Gynecology and Obstetrics, University of Pisa, Pisa, Italy. 3 NOGGO Study group and Gynecology with Center for Oncological Surgery, European Competence Center for Ovarian Cancer, Charité-Berlin University of Medicine, Berlin, Germany 4 Istituto di Ricerche Farmacologiche Mario Negri IRCCS, Milano, Italy. 5 NSGO-CTU & Department of Obstetrics and Gynaecology and Tays Cancer Centre Tampere University and University Hospital, Tampere, Finland .6 Istituto Oncologico della Svizzera Italiana, IOSI, Bellinzona, Switzerland and SAKK .7 Guys and St Thomas' NHS Foundation Trust, London, UK. 8 Medical Oncology, Radboud University Medical Center, Nijmegen, Netherlands. 9 Medical University of Innsbruck, Department for Gynecology and Obstetrics, Innsbruck, Austria, and AGO Austria 10 Gynecologic Oncology, University Hospitals Leuven, Leuven Cancer Institute, and BGOG, Leuven, Belgium, European Union .11 Hospital de Donosti San Sebastián, Spain and GEICO. 12 NSGO-CTU & Department of Oncology, Odense University Hospital, Odense, Denmark. 13 Oncology, Kantonsspital St. Gallen, St. Gallen, Switzerland and SAKK .14 Brighton and Sussex University Hospitals NHS Trust, Brighton UK. 15 Institut Catalá de Oncología de Girona, Spain and GEICO.16 NOGGO Study group and CaritasKlinikum St. Theresia – Saarbruecken, Germany. 17 NSGO-CTU & Department of Cancer Treatment, Copenhagen University Hospital, Copenhagen, Denmark 18 Hospital Son Llatzer, Palma de Mallorca, Spain.19 Institut Catalá de Oncología de Badalona, Spain and GEICO.20 Oncologia 2, Istituto Oncologico Veneto, Padua, Italy. 21 Institut Catalá de Oncología de Hospitalet, Barcelona, Spain and GEICO.22 Obstetrics and Gynaecology, ASST Spedali Civili-Università degli Studi di Brescia, Brescia, Italy.23 Hospital Reina Sofía Córdoba, Spain and GEICO.24 S.C. Oncologia Medica, E.O. Ospedali Galliera, Genoa, Italy. 25 IRCCS Istituto Romagnolo per lo Studio dei Tumori (IRST) "Dino Amadori", Meldola, Italy,26 AOU Città della Salute e della Scienza - OIRM S. Anna Torino, Italy.27 AOU Policlinico Umberto I di Roma, Rome Italy.28 Istituto di Candiolo, FPO-IRCCS and University of Torino, Italy 29 Ospedale Infermi-Rimini, Italy. Italy.30 IRCCS Azienda Ospedaliero-universitaria di Bologna, Bologna, Italy.31 Azienda Unità Sanitaria Locale di Reggio Emilia IRCCS, Reggio Emilia, Italy.32 Amsterdam UMC - Amsterdam, Netherlands. 33 Universitätsspital Basel, USB, Switzerland and SAKK 34 NOGGO Study group and Department of Gynecology and Obstetrics, Technische Universität Dresden, Fetscherstr, Dresden, Germany; National Center for Tumor Diseases (NCT/UCC), Dresden, Germany; German Cancer Research Center (DKFZ), Heidelberg, Germany; Faculty of Medicine and University Hospital Carl Gustav Carus, Technische Universität Dresden, Dresden, Germany; Helmholtz-Zentrum Dresden - Rossendorf (HZDR), Dresden, Germany.35 Initia Oncologia, Valencia, Spain and GEICO. 36 Istituto Europeo di Oncologia, Milano, 37 Ospedale Civile, Sondrio, Italy. 38 IRCCS Ospedale Policlinico San Martino, Genova, Italy, 39 Ospedale Del Ponte, Varese, Italy. 40 Azienda Ospedaliera S. Croce e Carle, Cuneo, Italy. 41 Fondazione Poliambulanza, Brescia, Italy. 42 AOU Maggiore della Carità, Novara, Italy. 43 Policlinico Umberto I, Università di Roma "La Sapienza", Roma, Italy. 44 Nuovo Ospedale di Prato S. Stefano, Prato, Italy.45 Azienda Ospedaliera SS Antonio e Biagio e Cesare Arrigo, Alessandria, Italy. 46 Istituto di Candiolo, FPO-IRCCS, Candiolo, Italy.47 Ospedale Degli Infermi, Biella, Italy.48 Ospedale SS Trinità, Sora,



Italy.49 IRCCS Policlinico S. Matteo, Pavia, Italy.50 AO Ordine Mauriziano, Torino, Italy.51 Ospedale Guglielmo da Saliceto, Piacenza, Italy.52 Azienda Ospedaliero Universitaria Policlinico di Modena, Modena, Italy. 53 Ospedale di Faenza, Faenza, Italy. 54 Ospedale Umberto I, Lugo, Italy. 55 U.L.S.S. 13 Mirano, Dolo, Noale, Italy. 56 AO della Provincia di Lecco, Ospedale Alessandro Manzoni, Lecco, Italy. 57 Ospedale di Santa Chiara, Trento, Italy. 58 Ospedale Regionale Umberto Parini, Aosta, Italy.59 Ospedale Valduce, Como, Italy. 60 Istituto di Ricovero e Cura a Carattere Scientifico - Centro Regionale Oncologico Basilicata, Rionero in Vulture, Italy. 61 P.O. "A.Perrino" ASL Brindisi, Italy. 62 ASL VC Ospedale S. Andrea, Vercelli, Italy. 63 Sacro Cuore Don Calabria, Negrar, Italy. 64 Ospedale S. Vincenzo, Taormina, Italy. 65 ARNAS Civico, Palermo, Italy. 66 Università degli Studi di Napoli Federico II, Napoli, Italy. 67 Ospedale San Giuseppe – Azienda USL11, Empoli, Italy. 68 Hospital La Fe, Valencia, Spain. 69 MD Anderson Cancer Center, Madrid, Spain. 70 Hospital Son Espases - Palma de Mallorca, Spain.71 Hospital General Universitario de Valencia, Valencia, Spain.72 Consorcio Hospitalario Provincial de Castellon, Castelló de la Plana, Spain. 73 H.U. Arnau de Vilanova, Lleida, Spain. 74 Consorci Sanitari De Terrassa, Terrassa, Spain. 75 Althaia, Manresa, Spain. 76 Hospital Universitario J.M. Morales Meseguer, Murcia, Spain. 77 Hospital Lluís Alcanyis Xativa, Valencia, Spain. 78 Corporacion Sanitaria y Universitaria Parc Tauli, Sabadell, Spain. 79 Hospital Universitario 12 de Octubre, Madrid, Spain. 80 Hospital General Universitario de Elche, Alicante, Spain. 81 Hospital Clinico Universitario Virgen De La Arrixaca, Murcia, Spain. 82 Charite Universitaetsmedizin Berlin, Germany.83 Schwerpunktpraxis für Gynäkologische Onkologie, Fürstenwalde, Germany. 84 Universitaetsklinikum Jena, Jena, Germany. 85 University Medical Center Hamburg, Hamburg, Germany. 86 University Hospital Dresden, Germany. 87 Praxisklinik Krebsheilkunde für Frauen, Berlin, Germany. 88 Vivantes Netzwerk für Gesundheit GmbH, Berlin, Germany. 89 Universitäts – Frauenklinik, Tübingen, Germany. 90 Universitaetsklinikum SH Campus Kiel, Kiel, Germany. 91 Kliniken Essen Mitte Evang. Huysens Stiftung, Essen, Germany. 92 Universitätsmedizin Greifswald, Greifswald, Germany. 93 Universitätsfrauenklinik Dusseldorf, Dusseldorf, Germany. 94 Klinikum Leverkusen gGmbH, Leverkusen, Germany. 95 UFK am Klinikum Suedstadt Rostock, Germany. 96 Studienzentrum Onkologie, Ravensburg, Germany. 97 Universitätsklinikum der Johannes-Gutenberg-Universität Mainz, Mainz, Germany. 98 Obstetrics and Gynaecology - Universitätsklinikum Wuerzburg, Wuerzburg, Germany. 99 University Hospital Aachen, Aachen, Germany.100 Worthing Hospital, Worthing, UK.101 Velindre Cancer Center – Whitchurch Cardiff, UK.102 Royal United Hospital Bath – Bath, UK.103 CHU Dinant Godinne / UCL Namur, Yvoir, Belgium. 104 UZ Leuven, Leuven, Belgium. 105 CMSE Clinique et Maternité Sainte-Elisabeth, Namur, Belgium.106 AZ Maria Middelaers, Gent, Belgium. 107 Kantonsspital Graubünden, Chur, Switzerland. 108 Kantonsspital Aarau, Switzerland. 109 Universitätsklinik für Frauenheilkunde, Universitätsklinik für Onkologische Medizin – Inselspital, Bern, Switzerland. 110 Luzerner Kantonsspital, Switzerland.111 Kantonsspital Olten, Switzerland. 112 Kantonsspital Frauenfeld, Switzerland. 113 Kantonsspital, Winterthur, Switzerland. 114 Kantonsspital, Münsterlingen, Switzerland. 115 Radium Hospitalet Oslo University Hospital, Oslo, Norway. 116 University Hospital of North Norway, Tromsø, Norway. 117 Stavanger University Hospital, Stavanger, Norway. 118 Oulu University Hospital, Oulu, Finland. 119 Kuopio University Hospital, Kuopio, Finland. 120 Medizinische Universität Graz, Graz, Austria. 121 Krankenhaus Der Barmherzigen Brüder, Graz, Austria. 122 Univ. Klinik Frauenheilkunde AKH, Wien, Austria. 123 Scottish Clinical Trials Research Unit, Edinburgh, Scotland, UK. 124 Grupo Español de Investigación en Cáncer de Ovario – GEICO, Madrid, Spain. 125 NOGGO e.V.Nord-Ostdeutsche Gesellschaft für Gynäkologische Onkologie (North Eastern German Society for gynaecological oncology), Berlin, Germany. 126 Swiss Group for Clinical Cancer Research (SAKK), Bern, Switzerland. 127 Nordic Society of Gynaecological Oncology – Clinical Trial Unit, Copenhagen, Denmark.
